# Supplementary material for: Perturbation and resilience of the gut microbiome up to 3 months after β-lactams exposure in healthy volunteers suggest an important role of microbial β-lactamases
Source: PubMed Central journal article supplement (PMC10929231; doi:10.1186/s40168-023-01746-0), 2024-03-12
Supplement: 40168_2023_1746_MOESM1_ESM.pdf [file 40168_2023_1746_MOESM1_ESM.pdf]

## Supplementary Appendix

### Supplementary Figure S1. Evolution of the gut microbiota and stool components in the 2 healthy volunteers with detectable levels of antibiotics in faeces.

For ‘low dimensionality’ systems, the log<sub>10</sub> fold changes from baseline are presented (except for variables relative to system’s richness which were not transformed), whereas for ‘high-dimensionality’ systems we depicted the normalized distance from baseline. In each graph the x-axis indicates the time following antibiotic administration, whereas the y-axis corresponds to the change from baseline (positive and/or negative) with the unit in brackets. The two selected individual are represented by a blue and red line, respectively. The dotted lines correspond to the median of the remaining 20 subjects. Cholesterol conv. rate, Cholesterol conversion rate; BA, Bile acids.

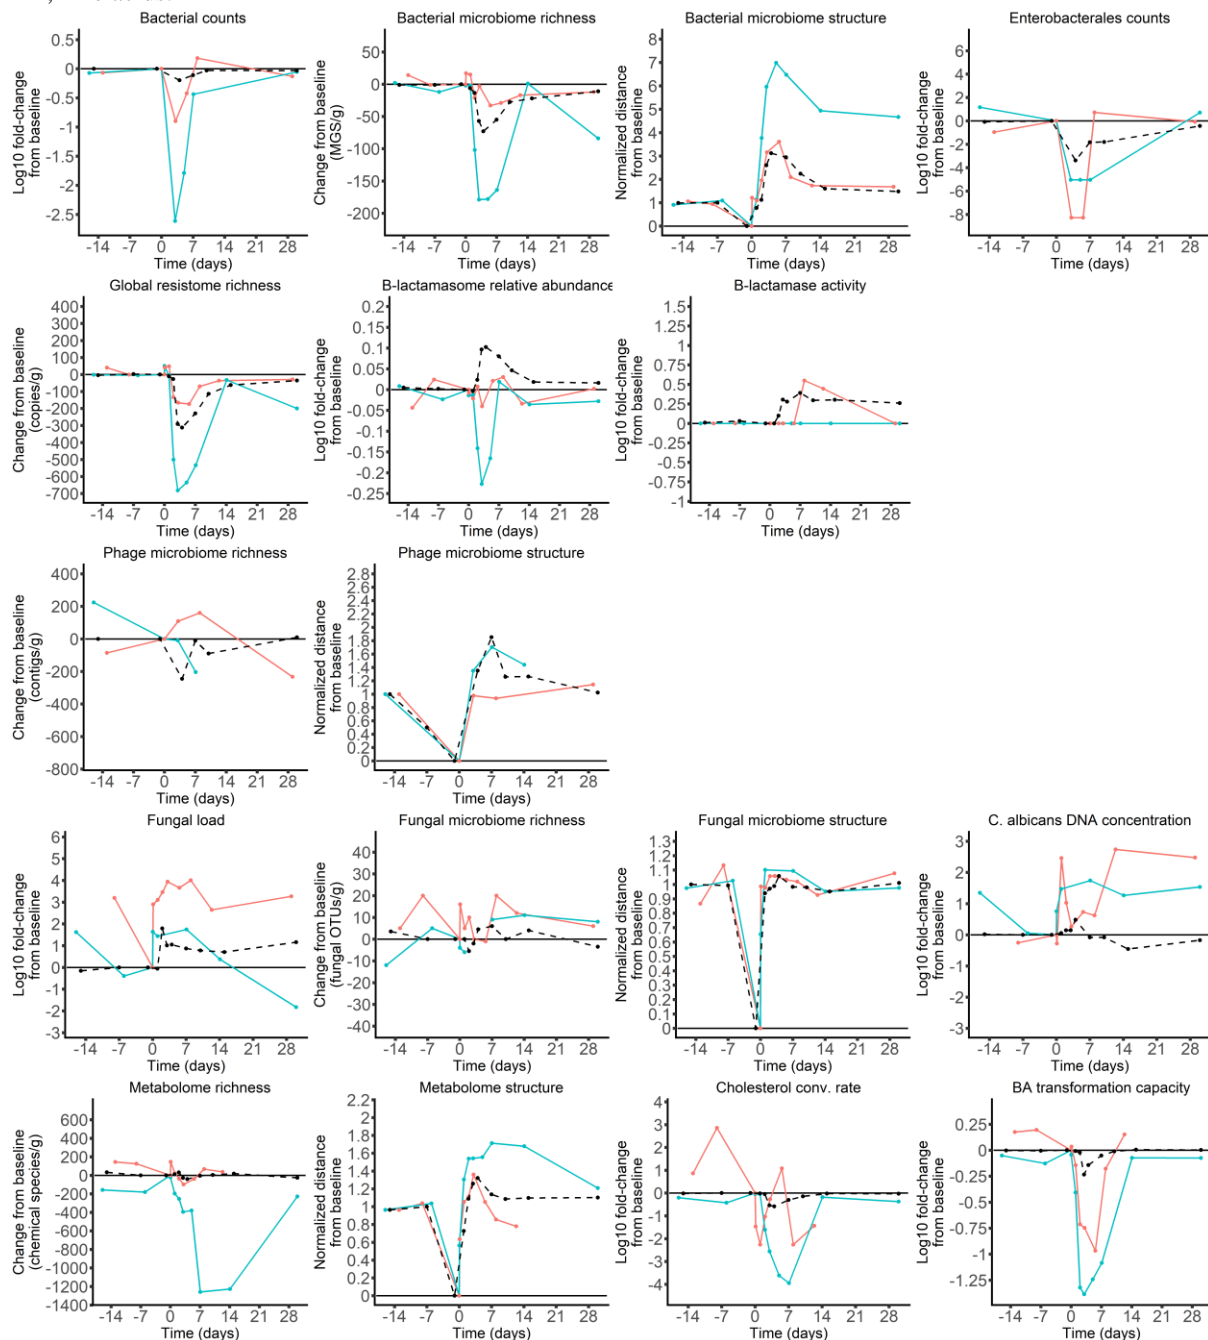

**Supplementary Table S1. Effect of the antibiotics on each of the studied components, according to the treatment group in the 22 healthy volunteers included in the CEREMI trial.**

For 'low dimensionality' systems, the log<sub>10</sub> fold changes from baseline were used (except for variables relative to system's richness which were not transformed), whereas for 'high-dimensionality' systems we used the normalized distance from baseline.

Baseline data were obtained from the day -1 sample. AUC D0D10 (respectively AUC D0D30) were normalized by the actual time observed between baseline and day 10 (respectively day 30). Data are presented as median (min; max). P-values refer to the result of non-parametric Wilcoxon test. Q-value corresponds to the test after Benjamini & Hochberg's correction. P-values and Q-values in bold represent values below 0.05.

| Endpoint                                                | n  | med (min; max)      | P-value        | Q-value        |
|---------------------------------------------------------|----|---------------------|----------------|----------------|
| <b>Bacterial counts (log<sub>10</sub> CFU/g)</b>        |    |                     |                |                |
| AUC D0D10                                               | 22 | -1.2 (-15; 2.3)     | <b>7.4E-03</b> | <b>1.3E-02</b> |
| AUC D0D30                                               | 21 | -2.9 (-16.3; 8.5)   | 8.2E-02        | 1.2E-01        |
| Day 4                                                   | 22 | -0.3 (-2.6; 0.2)    | <b>8.1E-04</b> | <b>1.8E-03</b> |
| Day 7                                                   | 22 | -0.1 (-1.8; 0.3)    | 1.4E-01        | 2.0E-01        |
| Day 10                                                  | 22 | 0 (-0.7; 0.3)       | 2.2E-01        | 2.8E-01        |
| Day 30                                                  | 21 | -0.1 (-0.3; 0.5)    | 4.5E-01        | 5.3E-01        |
| Day 90                                                  | -  | -                   | -              | -              |
| <b>Bacterial microbiome richness (MGS/g)</b>            |    |                     |                |                |
| AUC D0D10                                               | 22 | -411 (-1460; -76.2) | <b>4.8E-07</b> | <b>7.3E-06</b> |
| AUC D0D30                                               | 20 | -783 (-2590; 45.6)  | <b>3.8E-06</b> | <b>1.6E-05</b> |
| Day 4                                                   | 22 | -73 (-179; -3)      | <b>4.8E-07</b> | <b>7.3E-06</b> |
| Day 7                                                   | 22 | -55 (-178; 21)      | <b>8.0E-05</b> | <b>2.4E-04</b> |
| Day 10                                                  | 22 | -28.5 (-164; 5)     | <b>6.1E-05</b> | <b>1.9E-04</b> |
| Day 30                                                  | 21 | -11.5 (-84; 21)     | <b>2.7E-03</b> | <b>5.5E-03</b> |
| Day 90                                                  | 22 | -13 (-74; 35)       | <b>1.9E-02</b> | <b>3.0E-02</b> |
| <b>Bacterial microbiome structure</b>                   |    |                     |                |                |
| AUC D0D10                                               | 22 | 23.7 (13; 49.1)     | <b>4.8E-07</b> | <b>4.6E-06</b> |
| AUC D0D30                                               | 20 | 55.7 (36.9; 151)    | <b>1.9E-06</b> | <b>1.4E-05</b> |
| Day 4                                                   | 22 | 3.1 (1.1; 7.7)      | <b>4.8E-07</b> | <b>4.6E-06</b> |
| Day 7                                                   | 22 | 3 (1.6; 7)          | <b>4.8E-07</b> | <b>4.6E-06</b> |
| Day 10                                                  | 22 | 2.2 (1.3; 6.5)      | <b>4.8E-07</b> | <b>4.6E-06</b> |
| Day 30                                                  | 20 | 1.5 (0.9; 4.7)      | <b>3.6E-05</b> | <b>1.5E-04</b> |
| Day 90                                                  | 21 | 1.7 (0.9; 4.6)      | <b>4.8E-06</b> | <b>2.7E-05</b> |
| <b>Enterobacterales counts (log<sub>10</sub> CFU/g)</b> |    |                     |                |                |
| AUC D0D10                                               | 22 | -22.1 (-57.5; 24.1) | <b>4.2E-05</b> | <b>1.5E-04</b> |
| AUC D0D30                                               | 21 | -48.8 (-163; 145)   | <b>4.3E-04</b> | <b>1.1E-03</b> |
| Day 4                                                   | 22 | -3.5 (-8.3; 0)      | <b>6.0E-05</b> | <b>1.9E-04</b> |
| Day 7                                                   | 22 | -2.2 (-9; 5.9)      | <b>5.9E-04</b> | <b>1.4E-03</b> |
| Day 10                                                  | 22 | -1.8 (-9; 4.9)      | <b>6.9E-04</b> | <b>1.6E-03</b> |
| Day 30                                                  | 21 | -0.3 (-2.6; 6.9)    | 3.3E-01        | 4.1E-01        |
| Day 90                                                  | 22 | 0.1 (-3; 3.5)       | 8.5E-01        | 8.8E-01        |
| <b>Global resistome richness (copies/g)</b>             |    |                     |                |                |
| AUC D0D10                                               | 22 | -1850 (-4690; 116)  | <b>9.5E-07</b> | <b>7.3E-06</b> |
| AUC D0D30                                               | 20 | -3510 (-9320; 1000) | <b>5.7E-06</b> | <b>2.3E-05</b> |
| Day 4                                                   | 22 | -312 (-682; -122)   | <b>4.0E-05</b> | <b>1.5E-04</b> |
| Day 7                                                   | 22 | -229 (-635; 176)    | <b>1.2E-05</b> | <b>4.6E-05</b> |

| <b>Endpoint</b>                                                  | <b>n</b> | <b>med (min; max)</b> | <b>P-value</b> | <b>Q-value</b> |
|------------------------------------------------------------------|----------|-----------------------|----------------|----------------|
| Day 10                                                           | 22       | -114 (-534; 111)      | <b>2.1E-05</b> | <b>7.9E-05</b> |
| Day 30                                                           | 20       | -37.5 (-283; 173)     | <b>3.3E-02</b> | 5.2E-02        |
| Day 90                                                           | 21       | -51 (-320; 217)       | 1.2E-01        | 1.7E-01        |
| <b><math>\beta</math>-lactamasome relative abundance (log10)</b> |          |                       |                |                |
| AUC D0D10                                                        | 22       | 0.6 (-1.2; 1.4)       | <b>2.1E-04</b> | <b>5.7E-04</b> |
| AUC D0D30                                                        | 20       | 1 (-1.4; 2.8)         | <b>1.4E-03</b> | <b>3.0E-03</b> |
| Day 4                                                            | 22       | 0.1 (-0.2; 0.2)       | <b>5.0E-04</b> | <b>1.3E-03</b> |
| Day 7                                                            | 22       | 0.1 (-0.2; 0.2)       | <b>2.6E-04</b> | <b>6.9E-04</b> |
| Day 10                                                           | 22       | 0 (-0.1; 0.1)         | <b>6.5E-05</b> | <b>2.0E-04</b> |
| Day 30                                                           | 20       | 0 (0; 0.1)            | 1.6E-01        | 2.2E-01        |
| Day 90                                                           | 21       | 0 (-0.1; 0.1)         | 1.9E-01        | 2.5E-01        |
| <b><math>\beta</math>-lactamase activity (log10 nmol/min.g)</b>  |          |                       |                |                |
| AUC D0D10                                                        | 22       | 2.4 (-2.2; 8.7)       | <b>8.0E-04</b> | <b>1.8E-03</b> |
| AUC D0D30                                                        | 21       | 6.8 (-6.5; 26.7)      | <b>5.9E-04</b> | <b>1.4E-03</b> |
| Day 4                                                            | 22       | 0.2 (-0.6; 1.4)       | <b>4.4E-02</b> | 6.6E-02        |
| Day 7                                                            | 22       | 0.4 (-0.9; 1.2)       | <b>1.9E-03</b> | <b>3.9E-03</b> |
| Day 10                                                           | 22       | 0.3 (-0.2; 1.5)       | <b>2.1E-04</b> | <b>5.7E-04</b> |
| Day 30                                                           | 21       | 0.2 (-0.4; 0.8)       | <b>2.9E-03</b> | <b>5.8E-03</b> |
| Day 90                                                           | 22       | 0.1 (-0.4; 1)         | <b>4.4E-02</b> | 6.6E-02        |
| <b>Phage microbiome richness (contigs/g)</b>                     |          |                       |                |                |
| AUC D0D10                                                        | 20       | -1330 (-4190; 2230)   | <b>8.3E-03</b> | <b>1.4E-02</b> |
| AUC D0D30                                                        | 14       | -2030 (-5670; 8050)   | 1.5E-01        | 2.1E-01        |
| Day 4                                                            | 19       | -227 (-708; 219)      | <b>3.9E-03</b> | <b>7.7E-03</b> |
| Day 7                                                            | -        | -                     | -              | -              |
| Day 10                                                           | 20       | -90 (-421; 371)       | 6.4E-02        | 9.5E-02        |
| Day 30                                                           | 14       | -3.5 (-233; 206)      | >9.9E-01       | >9.9E-01       |
| Day 90                                                           | -        | -                     | -              | -              |
| <b>Phage microbiome structure</b>                                |          |                       |                |                |
| AUC D0D10                                                        | 20       | 12.7 (9.7; 19.8)      | <b>5.7E-06</b> | <b>3.1E-05</b> |
| AUC D0D30                                                        | 14       | 32 (27.4; 47)         | <b>4.0E-03</b> | <b>8.7E-03</b> |
| Day 4                                                            | 19       | 1.4 (0.9; 2.6)        | <b>7.2E-05</b> | <b>2.6E-04</b> |
| Day 7                                                            | -        | -                     | -              | -              |
| Day 10                                                           | 20       | 1.3 (0.9; 1.9)        | <b>1.9E-05</b> | <b>8.0E-05</b> |
| Day 30                                                           | 14       | 1 (0.7; 1.3)          | 7.1E-01        | 7.6E-01        |
| Day 90                                                           | -        | -                     | -              | -              |
| <b>Fungal load (log10)</b>                                       |          |                       |                |                |
| AUC D0D10                                                        | 20       | 6.7 (-9.1; 47.5)      | <b>8.3E-03</b> | <b>1.4E-02</b> |
| AUC D0D30                                                        | 19       | 35 (-39.2; 114)       | <b>5.3E-03</b> | <b>9.8E-03</b> |
| Day 4                                                            | 14       | 1.3 (-0.7; 5.4)       | <b>4.2E-02</b> | 6.5E-02        |
| Day 7                                                            | 19       | 0.9 (-0.6; 5.7)       | <b>9.7E-04</b> | <b>2.1E-03</b> |
| Day 10                                                           | 20       | 1.1 (-2.3; 4)         | <b>6.4E-03</b> | <b>1.1E-02</b> |
| Day 30                                                           | 19       | 1.2 (-1.8; 4.4)       | <b>1.1E-02</b> | <b>1.8E-02</b> |
| Day 90                                                           | 20       | 0.6 (-3.6; 6.8)       | 1.8E-01        | 2.4E-01        |
| <b>Fungal microbiome richness (fungal OTUs/g)</b>                |          |                       |                |                |
| AUC D0D10                                                        | 21       | 20 (-250; 181)        | 5.2E-01        | 6.0E-01        |

| Endpoint                                        | n  | med (min; max)       | P-value         | Q-value        |
|-------------------------------------------------|----|----------------------|-----------------|----------------|
| AUC D0D30                                       | 20 | 52.1 (-800; 520)     | 3.7E-01         | 4.5E-01        |
| Day 4                                           | 22 | 2 (-27; 24)          | 6.4E-01         | 7.1E-01        |
| Day 7                                           | 22 | 6 (-40; 33)          | 2.0E-01         | 2.6E-01        |
| Day 10                                          | 22 | 4 (-20; 21)          | 3.1E-01         | 3.9E-01        |
| Day 30                                          | 21 | -2.5 (-32; 32)       | 5.5E-01         | 6.3E-01        |
| Day 90                                          | 22 | 0 (-36; 28)          | 4.7E-01         | 5.5E-01        |
| <b>Fungal microbiome structure</b>              |    |                      |                 |                |
| AUC D0D10                                       | 21 | 9.9 (9; 12)          | >9.9E-01        | >9.9E-01       |
| AUC D0D30                                       | 20 | 29.4 (24.6; 35.1)    | 6.7E-01         | 7.3E-01        |
| Day 4                                           | 15 | 1.1 (0.8; 1.1)       | 2.5E-01         | 3.1E-01        |
| Day 7                                           | 21 | 1 (0.8; 1.3)         | 9.2E-01         | 9.5E-01        |
| Day 10                                          | 21 | 1 (0.8; 1.3)         | 4.3E-01         | 5.0E-01        |
| Day 30                                          | 20 | 1 (0.7; 1.2)         | 5.2E-01         | 5.9E-01        |
| Day 90                                          | 20 | 1 (0.7; 1.3)         | 5.7E-01         | 6.3E-01        |
| <b>C. albicans DNA concentration (log10)</b>    |    |                      |                 |                |
| AUC D0D10                                       | 20 | -0.4 (-22; 15.3)     | 7.8E-01         | 8.2E-01        |
| AUC D0D30                                       | 19 | -7.2 (-58.7; 59.1)   | 7.1E-01         | 7.6E-01        |
| Day 4                                           | 14 | 0.4 (-1.6; 2.4)      | 6.3E-01         | 7.0E-01        |
| Day 7                                           | 19 | 0 (-2.7; 1.8)        | 6.5E-01         | 7.1E-01        |
| Day 10                                          | 20 | 0 (-2.8; 1.7)        | 3.9E-01         | 4.7E-01        |
| Day 30                                          | 19 | 0 (-2; 2.5)          | 8.1E-01         | 8.5E-01        |
| Day 90                                          | 20 | -0.1 (-2.8; 0.8)     | 1.8E-01         | 2.4E-01        |
| <b>Metabolome richness (chemical species/g)</b> |    |                      |                 |                |
| AUC D0D10                                       | 21 | -162 (-4400; 5720)   | 2.6E-01         | 3.3E-01        |
| AUC D0D30                                       | 19 | -435 (-23400; 18400) | 3.1E-01         | 3.9E-01        |
| Day 4                                           | 22 | -61 (-394; 693)      | <b>1.2E-02</b>  | <b>2.0E-02</b> |
| Day 7                                           | 22 | -19.5 (-380; 515)    | 6.2E-01         | 7.0E-01        |
| Day 10                                          | 22 | 4 (-1260; 566)       | 9.9E-01         | >9.9E-01       |
| Day 30                                          | 21 | -27 (-229; 631)      | 8.7E-02         | 1.3E-01        |
| Day 90                                          | 22 | -28 (-97; 520)       | 4.5E-01         | 5.3E-01        |
| <b>Metabolome structure</b>                     |    |                      |                 |                |
| AUC D0D10                                       | 21 | 11.5 (9; 17.9)       | <b>4.10E-05</b> | <b>1.6E-04</b> |
| AUC D0D30                                       | 19 | 33.8 (27.3; 45.2)    | <b>6.40E-04</b> | <b>1.6E-03</b> |
| Day 4                                           | 22 | 1.3 (0.9; 2.1)       | <b>2.40E-06</b> | <b>1.6E-05</b> |
| Day 7                                           | 20 | 1.1 (0.9; 1.7)       | <b>1.20E-03</b> | <b>2.9E-03</b> |
| Day 10                                          | 21 | 1.1 (0.7; 2.1)       | 8.90E-02        | 1.2E-01        |
| Day 30                                          | 19 | 1.1 (0.8; 1.6)       | 5.50E-02        | 8.0E-02        |
| Day 90                                          | 21 | 1.2 (0.8; 1.8)       | <b>2.20E-02</b> | <b>3.7E-02</b> |
| <b>Cholesterol conversion rate (log10)</b>      |    |                      |                 |                |
| AUC D0D10                                       | 21 | -4.8 (-24.4; 8.7)    | <b>1.0E-03</b>  | <b>2.1E-03</b> |
| AUC D0D30                                       | 19 | -9.3 (-56.2; 17.9)   | <b>9.7E-04</b>  | <b>2.1E-03</b> |
| Day 4                                           | 22 | -0.6 (-3.3; 3.5)     | <b>4.2E-03</b>  | <b>8.1E-03</b> |
| Day 7                                           | 20 | -0.3 (-3.6; 1.1)     | <b>6.4E-03</b>  | <b>1.1E-02</b> |
| Day 10                                          | 21 | -0.2 (-4.3; 2.6)     | <b>4.9E-03</b>  | <b>9.2E-03</b> |
| Day 30                                          | 19 | 0 (-1; 0.2)          | 1.0E-01         | 1.4E-01        |

| <b>Endpoint</b>                                  | <b>n</b> | <b>med (min; max)</b> | <b>P-value</b> | <b>Q-value</b> |
|--------------------------------------------------|----------|-----------------------|----------------|----------------|
| Day 90                                           | 21       | 0 (-1.8; 1.8)         | 6.8E-01        | 7.4E-01        |
| <b>Bile acid transformation capacity (log10)</b> |          |                       |                |                |
| AUC D0D10                                        | 21       | -0.9 (-10.5; 0.7)     | <b>5.2E-05</b> | <b>1.8E-04</b> |
| AUC D0D30                                        | 19       | -1 (-12.7; 3.1)       | <b>7.1E-03</b> | <b>1.2E-02</b> |
| Day 4                                            | 21       | -0.2 (-1.4; 0)        | <b>2.9E-06</b> | <b>1.4E-05</b> |
| Day 7                                            | 21       | -0.1 (-1.2; 0.1)      | <b>4.3E-03</b> | <b>8.2E-03</b> |
| Day 10                                           | 21       | 0 (-1.1; 0.1)         | <b>1.9E-02</b> | <b>3.0E-02</b> |
| Day 30                                           | 19       | 0 (-0.1; 0.4)         | 7.4E-01        | 7.9E-01        |
| Day 90                                           | 20       | 0 (-0.4; 0.4)         | >9.9E-01       | >9.9E-01       |

**Supplementary Table S2. Comparison of ceftriaxone and cefotaxime effect on each of the studied component, according to the treatment group in the 22 healthy volunteers included in the CEREMI trial.**

For 'low dimensionality' systems, the log<sub>10</sub> fold changes from baseline were used (except for variables relative to system's richness which were not transformed), whereas for 'high-dimensionality' systems we used the normalized distance from baseline.

Baseline data were obtained from the day -1 sample. AUC D0D10 (respectively AUCD0D30) were normalized by the actual time observed between baseline and day 10 (respectively day 30). Data are presented as median (min; max). P-values refer to the result of non-parametric Wilcoxon test. Q-value corresponds to the test after Benjamini & Hochberg's correction. P-values and Q-values in bold represent values below 0.05.

| Endpoint                                                | Ceftriaxone |                      | Cefotaxime |                     | P-value  | Q-value  |
|---------------------------------------------------------|-------------|----------------------|------------|---------------------|----------|----------|
|                                                         | n           | med (min; max)       | n          | med (min; max)      |          |          |
| <b>Bacterial counts (log<sub>10</sub> CFU/g)</b>        |             |                      |            |                     |          |          |
| AUC D0D10                                               | 11          | -0.7 (-15; 2.3)      | 11         | -1.7 (-4.2; 1.6)    | 7.0E-01  | 9.6E-01  |
| AUC D0D30                                               | 10          | -0.9 (-16.3; 8.5)    | 11         | -3 (-9.6; 7.4)      | >9.9E-01 | >9.9E-01 |
| Day 4                                                   | 11          | -0.1 (-2.6; 0.2)     | 11         | -0.3 (-0.9; 0.1)    | 5.2E-01  | 9.4E-01  |
| Day 7                                                   | 11          | -0.1 (-1.8; 0.3)     | 11         | -0.2 (-0.7; 0.3)    | 6.1E-01  | 9.4E-01  |
| Day 10                                                  | 11          | -0.1 (-0.7; 0.3)     | 11         | 0 (-0.4; 0.3)       | 2.2E-01  | 9.4E-01  |
| Day 30                                                  | 10          | 0 (-0.3; 0.5)        | 11         | -0.1 (-0.3; 0.4)    | 2.0E-01  | 9.4E-01  |
| Day 90                                                  | -           | -                    | -          | -                   | -        | -        |
| <b>Bacterial microbiome richness (MGS/g)</b>            |             |                      |            |                     |          |          |
| AUC D0D10                                               | 11          | -452 (-1270; -76.2)  | 11         | -403 (-1460; -148)  | 6.5E-01  | 9.4E-01  |
| AUC D0D30                                               | 10          | -855 (-2230; 45.6)   | 10         | -736 (-2590; -476)  | >9.9E-01 | >9.9E-01 |
| Day 4                                                   | 11          | -64 (-179; -11)      | 11         | -81 (-170; -3)      | 4.4E-01  | 9.4E-01  |
| Day 7                                                   | 11          | -56 (-178; 1)        | 11         | -54 (-118; 21)      | 4.1E-01  | 9.4E-01  |
| Day 10                                                  | 11          | -47 (-164; 1)        | 11         | -24 (-78; 5)        | 8.2E-02  | 9.4E-01  |
| Day 30                                                  | 10          | -13.5 (-84; 3)       | 11         | -11.5 (-76; 21)     | 9.4E-01  | >9.9E-01 |
| Day 90                                                  | 11          | -13 (-57; 18)        | 11         | -15 (-74; 35)       | 9.4E-01  | >9.9E-01 |
| <b>Bacterial microbiome structure</b>                   |             |                      |            |                     |          |          |
| AUC D0D10                                               | 11          | 18.7 (13; 49.1)      | 11         | 24.9 (14; 48.9)     | 4.0E-01  | 9.9E-01  |
| AUC D0D30                                               | 10          | 57.4 (39.2; 151)     | 10         | 52.9 (36.9; 109)    | 6.3E-01  | 9.9E-01  |
| Day 4                                                   | 11          | 2 (1.1; 6)           | 11         | 3.2 (1.4; 7.7)      | 2.4E-01  | 9.9E-01  |
| Day 7                                                   | 11          | 2.9 (1.6; 7)         | 11         | 3 (1.6; 6.6)        | 8.5E-01  | 9.9E-01  |
| Day 10                                                  | 11          | 2.7 (1.3; 6.5)       | 11         | 2.1 (1.3; 3.3)      | 2.2E-01  | 9.9E-01  |
| Day 30                                                  | 10          | 1.7 (0.9; 4.7)       | 10         | 1.4 (1; 2.4)        | 6.8E-01  | 9.9E-01  |
| Day 90                                                  | 11          | 1.7 (0.9; 4.6)       | 10         | 1.6 (1; 3.3)        | 6.5E-01  | 9.9E-01  |
| <b>Enterobacterales counts (log<sub>10</sub> CFU/g)</b> |             |                      |            |                     |          |          |
| AUC D0D10                                               | 11          | -22.2 (-57.5; -15.7) | 11         | -14.5 (-53.2; 24.1) | 7.6E-02  | 9.4E-01  |
| AUC D0D30                                               | 10          | -52.6 (-163; -19.8)  | 11         | -34.8 (-79.5; 145)  | 2.8E-01  | 9.4E-01  |
| Day 4                                                   | 11          | -3.5 (-7.2; -1.3)    | 11         | -3.4 (-8.3; 0)      | 7.5E-01  | 9.6E-01  |
| Day 7                                                   | 11          | -3.6 (-9; 1.1)       | 11         | -0.8 (-8.3; 5.9)    | 8.8E-02  | 9.4E-01  |
| Day 10                                                  | 11          | -2.6 (-9; 0)         | 11         | -1.3 (-3.7; 4.9)    | 5.6E-02  | 9.4E-01  |
| Day 30                                                  | 10          | 0.2 (-1.8; 1.7)      | 11         | -0.8 (-2.6; 6.9)    | 1.5E-01  | 9.4E-01  |
| Day 90                                                  | 11          | 0.3 (-0.8; 2.3)      | 11         | -0.2 (-3; 3.5)      | 4.0E-01  | 9.4E-01  |
| <b>Global resistome richness (copies/g)</b>             |             |                      |            |                     |          |          |
| AUC D0D10                                               | 11          | -1790 (-4690; -522)  | 11         | -1910 (-2900; 116)  | 8.5E-01  | 9.6E-01  |

Supplementary appendix for :

d'Humières, C. et al. Perturbation and resilience of the gut microbiome up to three months after  $\beta$ -lactams exposure in healthy volunteers suggest an important role of microbial  $\beta$ -lactamases

|                                                                  |    |                     |    |                      |                |          |
|------------------------------------------------------------------|----|---------------------|----|----------------------|----------------|----------|
| AUC D0D30                                                        | 10 | -3680 (-9320; 1000) | 10 | -3190 (-6900; -20.2) | 4.8E-01        | 9.4E-01  |
| Day 4                                                            | 11 | -285 (-682; -122)   | 11 | -319 (-476; -166)    | 5.3E-01        | 9.4E-01  |
| Day 7                                                            | 11 | -294 (-635; -56)    | 11 | -212 (-374; 176)     | 3.3E-01        | 9.4E-01  |
| Day 10                                                           | 11 | -168 (-534; -13)    | 11 | -78 (-175; 111)      | 7.6E-02        | 9.4E-01  |
| Day 30                                                           | 10 | -69.5 (-200; 67)    | 10 | -27 (-283; 173)      | 7.4E-01        | 9.6E-01  |
| Day 90                                                           | 11 | -46 (-250; 217)     | 10 | -57 (-320; 209)      | 8.3E-01        | 9.6E-01  |
| <b><math>\beta</math>-lactamasome relative abundance (log10)</b> |    |                     |    |                      |                |          |
| AUC D0D10                                                        | 11 | 0.6 (-1.2; 1.4)     | 11 | 0.7 (0; 1.2)         | 6.5E-01        | 9.4E-01  |
| AUC D0D30                                                        | 10 | 1.1 (-1.4; 2.8)     | 10 | 1 (-0.3; 1.8)        | 8.5E-01        | 9.6E-01  |
| Day 4                                                            | 11 | 0.1 (-0.2; 0.2)     | 11 | 0.1 (0; 0.2)         | 2.7E-01        | 9.4E-01  |
| Day 7                                                            | 11 | 0.1 (-0.2; 0.1)     | 11 | 0.1 (0; 0.2)         | 7.0E-01        | 9.6E-01  |
| Day 10                                                           | 11 | 0.1 (-0.1; 0.1)     | 11 | 0 (0; 0.1)           | 3.0E-01        | 9.4E-01  |
| Day 30                                                           | 10 | 0 (0; 0.1)          | 10 | 0 (0; 0.1)           | 5.3E-01        | 9.4E-01  |
| Day 90                                                           | 11 | 0 (-0.1; 0.1)       | 10 | 0 (0; 0.1)           | 6.0E-01        | 9.4E-01  |
| <b><math>\beta</math>-lactamase activity (log10 nmol/min.g)</b>  |    |                     |    |                      |                |          |
| AUC D0D10                                                        | 11 | 3.6 (-1.4; 8.1)     | 11 | 2.1 (-2.2; 8.7)      | 2.4E-01        | 9.4E-01  |
| AUC D0D30                                                        | 10 | 12.5 (-6.5; 26.7)   | 11 | 6.7 (-1.2; 21.8)     | 5.6E-01        | 9.4E-01  |
| Day 4                                                            | 11 | 0.4 (-0.3; 0.8)     | 11 | 0 (-0.6; 1.4)        | 2.4E-01        | 9.4E-01  |
| Day 7                                                            | 11 | 0.4 (0; 1.2)        | 11 | 0.3 (-0.9; 0.8)      | 2.9E-01        | 9.4E-01  |
| Day 10                                                           | 11 | 0.5 (-0.2; 1.5)     | 11 | 0.3 (-0.1; 1.1)      | 7.5E-01        | 9.6E-01  |
| Day 30                                                           | 10 | 0.4 (-0.4; 0.8)     | 11 | 0.2 (-0.1; 0.6)      | 3.4E-01        | 9.4E-01  |
| Day 90                                                           | 11 | 0.1 (-0.4; 1)       | 11 | 0.2 (-0.2; 0.9)      | 9.2E-01        | >9.9E-01 |
| <b>Phage microbiome richness (contigs/g)</b>                     |    |                     |    |                      |                |          |
| AUC D0D10                                                        | 10 | -1740 (-4190; 1450) | 10 | -631 (-2470; 2230)   | 1.1E-01        | 9.4E-01  |
| AUC D0D30                                                        | 6  | -2790 (-5670; 4740) | 8  | -630 (-4130; 8050)   | 2.8E-01        | 9.4E-01  |
| Day 4                                                            | 10 | -292 (-708; 144)    | 9  | -206 (-388; 219)     | 2.1E-01        | 9.4E-01  |
| Day 7                                                            | -  | -                   | -  | -                    | -              | -        |
| Day 10                                                           | 10 | -200 (-421; 243)    | 10 | -27 (-304; 371)      | <b>4.3E-02</b> | 9.4E-01  |
| Day 30                                                           | 6  | 56 (-59; 198)       | 8  | -34 (-233; 206)      | 2.8E-01        | 9.4E-01  |
| Day 90                                                           | -  | -                   | -  | -                    | -              | -        |
| <b>Phage microbiome structure</b>                                |    |                     |    |                      |                |          |
| AUC D0D10                                                        | 10 | 13.3 (10.6; 17.3)   | 10 | 12.2 (9.7; 19.8)     | 9.7E-01        | >9.9E-01 |
| AUC D0D30                                                        | 6  | 32.4 (27.4; 38.4)   | 8  | 32 (29.8; 47)        | 7.5E-01        | 9.9E-01  |
| Day 4                                                            | 10 | 1.3 (0.9; 2.3)      | 9  | 1.5 (1; 2.6)         | 4.5E-01        | 9.9E-01  |
| Day 7                                                            | -  | -                   | -  | -                    | -              | -        |
| Day 10                                                           | 10 | 1.3 (1; 1.9)        | 10 | 1.2 (0.9; 1.6)       | 2.5E-01        | 9.9E-01  |
| Day 30                                                           | 6  | 1 (0.7; 1.2)        | 8  | 1.1 (0.8; 1.3)       | 2.3E-01        | 9.9E-01  |
| Day 90                                                           | -  | -                   | -  | -                    | -              | -        |
| <b>Fungal load (log10)</b>                                       |    |                     |    |                      |                |          |
| AUC D0D10                                                        | 11 | 10.6 (-9.1; 47.5)   | 9  | 2.2 (-6.2; 36.1)     | 5.5E-01        | 9.4E-01  |
| AUC D0D30                                                        | 10 | 42.4 (-18.9; 114)   | 9  | 27.7 (-39.2; 95.8)   | 4.5E-01        | 9.4E-01  |
| Day 4                                                            | 6  | 1.6 (-0.5; 5.4)     | 8  | 0.6 (-0.7; 3.9)      | 5.7E-01        | 9.4E-01  |
| Day 7                                                            | 10 | 1.4 (-0.4; 5.7)     | 9  | 0.9 (-0.6; 3.7)      | 7.8E-01        | 9.6E-01  |
| Day 10                                                           | 11 | 1.6 (-0.7; 3.6)     | 9  | 0.4 (-2.3; 4)        | 3.7E-01        | 9.4E-01  |
| Day 30                                                           | 10 | 1.2 (-1.8; 4.4)     | 9  | 1.2 (-1.5; 4.1)      | 9.0E-01        | 1.0E+00  |
| Day 90                                                           | 11 | 0.2 (-3.6; 6.8)     | 9  | 0.9 (-1; 4)          | 4.6E-01        | 9.4E-01  |

| <b>Fungal microbiome richness (fungal OTUs/g)</b> |    |                     |    |                     |                |          |
|---------------------------------------------------|----|---------------------|----|---------------------|----------------|----------|
| AUC D0D10                                         | 11 | -0.8 (-250; 126)    | 10 | 49.9 (-227; 181)    | 5.1E-01        | 9.4E-01  |
| AUC D0D30                                         | 10 | -29.9 (-800; 285)   | 10 | 153 (-478; 520)     | 2.8E-01        | 9.4E-01  |
| Day 4                                             | 11 | 3.5 (-27; 24)       | 11 | 2 (-25; 16)         | 6.4E-01        | 9.4E-01  |
| Day 7                                             | 11 | 5.5 (-40; 31)       | 11 | 6 (-29; 33)         | 8.3E-01        | 9.6E-01  |
| Day 10                                            | 11 | -1 (-12; 18)        | 11 | 6.5 (-20; 21)       | 3.4E-01        | 9.4E-01  |
| Day 30                                            | 10 | -3.5 (-23; 15)      | 11 | 1.5 (-32; 32)       | 5.2E-01        | 9.4E-01  |
| Day 90                                            | 11 | 1.5 (-13; 17)       | 11 | -2 (-36; 28)        | 7.6E-01        | 9.6E-01  |
| <b>Fungal microbiome structure</b>                |    |                     |    |                     |                |          |
| AUC D0D10                                         | 11 | 9.9 (9; 12)         | 10 | 10.1 (9; 11.3)      | 6.0E-01        | 9.9E-01  |
| AUC D0D30                                         | 10 | 29.2 (26.2; 32.7)   | 10 | 30.2 (24.6; 35.1)   | 2.8E-01        | 9.9E-01  |
| Day 4                                             | 6  | 1 (0.8; 1.1)        | 9  | 1.1 (0.9; 1.1)      | 9.5E-01        | >9.9E-01 |
| Day 7                                             | 10 | 1 (0.9; 1.2)        | 11 | 1 (0.8; 1.3)        | 6.0E-01        | 9.9E-01  |
| Day 10                                            | 11 | 1 (0.8; 1.1)        | 10 | 1 (0.8; 1.3)        | 7.6E-01        | 9.9E-01  |
| Day 30                                            | 10 | 1 (0.9; 1.1)        | 10 | 1.1 (0.7; 1.2)      | 4.4E-01        | 9.9E-01  |
| Day 90                                            | 10 | 1 (0.8; 1.2)        | 10 | 1 (0.7; 1.3)        | 8.5E-01        | 9.9E-01  |
| <b>C. albicans DNA concentration (log10)</b>      |    |                     |    |                     |                |          |
| AUC D0D10                                         | 11 | 0.9 (-16.1; 15.3)   | 9  | -1.7 (-22; 10.7)    | 6.6E-01        | 9.4E-01  |
| AUC D0D30                                         | 10 | 8.8 (-28.6; 43.6)   | 9  | -14.1 (-58.7; 59.1) | 2.1E-01        | 9.4E-01  |
| Day 4                                             | 6  | 0.7 (-1.4; 1.5)     | 8  | 0 (-1.6; 2.4)       | 6.6E-01        | 9.4E-01  |
| Day 7                                             | 10 | -0.2 (-1.3; 1.8)    | 9  | 0.1 (-2.7; 1.7)     | >9.9E-01       | >9.9E-01 |
| Day 10                                            | 11 | 0.1 (-2.8; 1.7)     | 9  | -0.8 (-2.6; 1)      | 4.1E-01        | 9.4E-01  |
| Day 30                                            | 10 | 0.4 (-1.1; 1.5)     | 9  | -0.2 (-2; 2.5)      | 4.0E-01        | 9.4E-01  |
| Day 90                                            | 11 | -0.1 (-2.8; 0.8)    | 9  | -0.2 (-1.6; 0.5)    | >9.9E-01       | >9.9E-01 |
| <b>Metabolome richness (chemical species/g)</b>   |    |                     |    |                     |                |          |
| AUC D0D10                                         | 11 | -290 (-4400; 717)   | 10 | -109 (-849; 5720)   | 6.0E-01        | 9.4E-01  |
| AUC D0D30                                         | 10 | -662 (-23400; 1500) | 9  | -409 (-2860; 18400) | 6.6E-01        | 9.4E-01  |
| Day 4                                             | 11 | -65 (-394; 117)     | 11 | -21 (-108; 693)     | 1.3E-01        | 9.4E-01  |
| Day 7                                             | 11 | 4 (-380; 150)       | 11 | -25 (-67; 515)      | 8.2E-01        | 9.6E-01  |
| Day 10                                            | 11 | -15 (-1260; 117)    | 11 | 42.5 (-136; 566)    | 4.8E-01        | 9.4E-01  |
| Day 30                                            | 10 | -41 (-229; 63)      | 11 | -27 (-143; 631)     | 7.2E-01        | 9.6E-01  |
| Day 90                                            | 11 | -28 (-86; 79)       | 11 | -15.5 (-97; 520)    | 8.1E-01        | 9.6E-01  |
| <b>Metabolome structure</b>                       |    |                     |    |                     |                |          |
| AUC D0D10                                         | 11 | 11.4 (9; 17.9)      | 10 | 11.6 (10.3; 13.9)   | 8.1E-01        | 9.9E-01  |
| AUC D0D30                                         | 10 | 33.9 (27.3; 45.2)   | 9  | 33.8 (28.3; 41.5)   | 9.0E-01        | 1.0E+00  |
| Day 4                                             | 11 | 1.3 (1; 2)          | 11 | 1.4 (0.9; 2.1)      | 5.2E-01        | 9.9E-01  |
| Day 7                                             | 11 | 1.2 (1; 1.7)        | 9  | 1 (0.9; 1.4)        | 5.0E-02        | 9.9E-01  |
| Day 10                                            | 11 | 1.1 (0.7; 2.1)      | 10 | 1 (0.9; 1.2)        | 9.0E-02        | 9.9E-01  |
| Day 30                                            | 10 | 1.1 (0.8; 1.3)      | 9  | 1.1 (0.9; 1.6)      | 6.0E-01        | 9.9E-01  |
| Day 90                                            | 11 | 1.2 (0.8; 1.3)      | 10 | 1.2 (0.8; 1.8)      | 8.6E-01        | 9.9E-01  |
| <b>Cholesterol conversion rate (log10)</b>        |    |                     |    |                     |                |          |
| AUC D0D10                                         | 11 | -2.2 (-23.8; 8.7)   | 10 | -9.6 (-24.4; -3.2)  | <b>1.3E-02</b> | 9.4E-01  |
| AUC D0D30                                         | 10 | -5.1 (-35.7; 17.9)  | 9  | -13.6 (-56.2; -2.6) | 2.1E-01        | 9.4E-01  |
| Day 4                                             | 11 | -0.1 (-3.1; 3.5)    | 11 | -1.8 (-3.3; 0)      | <b>4.7E-02</b> | 9.4E-01  |
| Day 7                                             | 11 | -0.2 (-3.6; 0.4)    | 9  | -1.2 (-3.6; 1.1)    | 7.7E-01        | 9.6E-01  |
| Day 10                                            | 11 | -0.3 (-3.9; 2.6)    | 10 | -0.1 (-4.3; 0.1)    | 7.6E-01        | 9.6E-01  |



|                                                  |    |                   |    |                  |          |          |
|--------------------------------------------------|----|-------------------|----|------------------|----------|----------|
| Day 30                                           | 10 | 0 (-1; 0.2)       | 9  | 0 (-0.3; 0.1)    | 4.5E-01  | 9.4E-01  |
| Day 90                                           | 11 | 0 (-0.2; 0.8)     | 10 | -0.1 (-1.8; 1.8) | 2.2E-01  | 9.4E-01  |
| <b>Bile acid transformation capacity (log10)</b> |    |                   |    |                  |          |          |
| AUC D0D10                                        | 11 | -0.8 (-10.5; 0.7) | 10 | -1.4 (-5.9; 0.3) | 2.5E-01  | 9.4E-01  |
| AUC D0D30                                        | 10 | -1 (-12.7; 3.1)   | 9  | -1.1 (-7.1; 1.5) | >9.9E-01 | >9.9E-01 |
| Day 4                                            | 10 | -0.1 (-1.4; 0)    | 11 | -0.2 (-0.7; 0)   | 1.5E-01  | 9.4E-01  |
| Day 7                                            | 11 | -0.1 (-1.2; 0.1)  | 10 | -0.1 (-1; 0.1)   | 7.6E-01  | 9.6E-01  |
| Day 10                                           | 11 | -0.1 (-1.1; 0.1)  | 10 | 0 (-0.2; 0.1)    | 3.9E-01  | 9.4E-01  |
| Day 30                                           | 10 | 0 (-0.1; 0.4)     | 9  | 0 (0; 0.1)       | 1.6E-01  | 9.4E-01  |
| Day 90                                           | 10 | 0 (-0.4; 0.4)     | 10 | 0 (-0.2; 0.2)    | 3.9E-01  | 9.4E-01  |

**Supplementary Table S3. Spearman's correlations of the maximal perturbations of studied gut microbiota and stool components in the 22 healthy volunteers included in the CEREMI trial.**

P-values corresponds to the uncorrected test of the Spearman's correlation coefficient to 0. Q-value corresponds to the test of the Spearman's correlation coefficient to 0 after Benjamini & Hochberg's correction. P-values and Q-values in bold represent values below 0.05. Conc., concentration; Cholesterol conv. rate, Cholesterol conversion rate; BA transf. Capacity, Bile acids transformation capacity.

| Variable 1                     | Variable 2                     | Correlation | P-value        | Q-value  |
|--------------------------------|--------------------------------|-------------|----------------|----------|
| Bacterial counts               | Bacterial microbiome richness  | 0.56        | <b>6.7E-03</b> | 2.3E-01  |
| Bacterial counts               | Bacterial microbiome structure | 0.42        | 5.6E-02        | 3.8E-01  |
| Bacterial counts               | Enterobacterales counts        | 0.01        | 9.8E-01        | >9.9E-01 |
| Bacterial counts               | Global resistome richness      | 0.48        | <b>2.6E-02</b> | 3.6E-01  |
| Bacterial counts               | B-lactamasome abundance        | 0.26        | 2.4E-01        | 7.3E-01  |
| Bacterial counts               | B-lactamase activity           | 0.26        | 2.4E-01        | 7.3E-01  |
| Bacterial counts               | Phage microbiome richness      | -0.52       | <b>1.7E-02</b> | 3.3E-01  |
| Bacterial counts               | Phage microbiome structure     | -0.15       | 5.3E-01        | 9.4E-01  |
| Bacterial counts               | Fungal load                    | -0.49       | <b>2.6E-02</b> | 3.6E-01  |
| Bacterial counts               | Fungal microbiome richness     | -0.13       | 5.6E-01        | 9.4E-01  |
| Bacterial counts               | Fungal microbiome structure    | 0.01        | 9.5E-01        | >9.9E-01 |
| Bacterial counts               | C. albicans DNA conc.          | -0.20       | 3.9E-01        | 8.5E-01  |
| Bacterial counts               | Metabolome richness            | -0.05       | 8.3E-01        | 9.9E-01  |
| Bacterial counts               | Metabolome structure           | 0.02        | 9.4E-01        | >9.9E-01 |
| Bacterial counts               | Cholesterol conv. rate         | -0.32       | 1.5E-01        | 7.0E-01  |
| Bacterial counts               | BA transf. capacity            | 0.11        | 6.1E-01        | 9.4E-01  |
| Bacterial microbiome richness  | Bacterial microbiome structure | 0.10        | 6.6E-01        | 9.7E-01  |
| Bacterial microbiome richness  | Enterobacterales counts        | -0.29       | 2.0E-01        | 7.0E-01  |
| Bacterial microbiome richness  | Global resistome richness      | 0.66        | <b>7.6E-04</b> | 5.2E-02  |
| Bacterial microbiome richness  | B-lactamasome abundance        | 0.28        | 2.0E-01        | 7.0E-01  |
| Bacterial microbiome richness  | B-lactamase activity           | -0.01       | 9.7E-01        | >9.9E-01 |
| Bacterial microbiome richness  | Phage microbiome richness      | -0.12       | 5.9E-01        | 9.4E-01  |
| Bacterial microbiome richness  | Phage microbiome structure     | 0.27        | 2.4E-01        | 7.3E-01  |
| Bacterial microbiome richness  | Fungal load                    | -0.44       | <b>4.8E-02</b> | 3.8E-01  |
| Bacterial microbiome richness  | Fungal microbiome richness     | 0.03        | 8.9E-01        | >9.9E-01 |
| Bacterial microbiome richness  | Fungal microbiome structure    | 0.22        | 3.2E-01        | 8.1E-01  |
| Bacterial microbiome richness  | C. albicans DNA conc.          | -0.32       | 1.5E-01        | 7.0E-01  |
| Bacterial microbiome richness  | Metabolome richness            | -0.01       | 9.5E-01        | >9.9E-01 |
| Bacterial microbiome richness  | Metabolome structure           | 0.00        | 9.9E-01        | >9.9E-01 |
| Bacterial microbiome richness  | Cholesterol conv. rate         | -0.29       | 1.9E-01        | 7.0E-01  |
| Bacterial microbiome richness  | BA transf. capacity            | 0.42        | 5.2E-02        | 3.8E-01  |
| Bacterial microbiome structure | Enterobacterales counts        | -0.11       | 6.3E-01        | 9.5E-01  |
| Bacterial microbiome structure | Global resistome richness      | 0.08        | 7.1E-01        | 9.8E-01  |
| Bacterial microbiome structure | B-lactamasome abundance        | 0.03        | 8.9E-01        | >9.9E-01 |
| Bacterial microbiome structure | B-lactamase activity           | 0.24        | 2.7E-01        | 7.7E-01  |

| Variable 1                     | Variable 2                  | Correlation | P-value        | Q-value  |
|--------------------------------|-----------------------------|-------------|----------------|----------|
| Bacterial microbiome structure | Phage microbiome richness   | -0.44       | <b>4.8E-02</b> | 3.8E-01  |
| Bacterial microbiome structure | Phage microbiome structure  | 0.30        | 1.9E-01        | 7.0E-01  |
| Bacterial microbiome structure | Fungal load                 | -0.04       | 8.8E-01        | >9.9E-01 |
| Bacterial microbiome structure | Fungal microbiome richness  | -0.13       | 5.6E-01        | 9.4E-01  |
| Bacterial microbiome structure | Fungal microbiome structure | 0.36        | 1.0E-01        | 5.8E-01  |
| Bacterial microbiome structure | C. albicans DNA conc.       | -0.09       | 6.9E-01        | 9.7E-01  |
| Bacterial microbiome structure | Metabolome richness         | 0.00        | 9.9E-01        | >9.9E-01 |
| Bacterial microbiome structure | Metabolome structure        | 0.50        | <b>1.9E-02</b> | 3.3E-01  |
| Bacterial microbiome structure | Cholesterol conv. rate      | 0.37        | 9.2E-02        | 5.6E-01  |
| Bacterial microbiome structure | BA transf. capacity         | 0.55        | <b>8.6E-03</b> | 2.3E-01  |
| Enterobacterales counts        | Phage microbiome richness   | -0.06       | 8.1E-01        | 9.9E-01  |
| Enterobacterales counts        | Phage microbiome structure  | -0.33       | 1.5E-01        | 7.0E-01  |
| Enterobacterales counts        | Global resistome richness   | -0.20       | 3.7E-01        | 8.4E-01  |
| Enterobacterales counts        | B-lactamase activity        | 0.02        | 9.5E-01        | >9.9E-01 |
| Enterobacterales counts        | B-lactamasome abundance     | 0.08        | 7.2E-01        | 9.8E-01  |
| Enterobacterales counts        | Fungal load                 | 0.38        | 9.4E-02        | 5.6E-01  |
| Enterobacterales counts        | Fungal microbiome richness  | 0.17        | 4.4E-01        | 8.8E-01  |
| Enterobacterales counts        | Fungal microbiome structure | -0.14       | 5.4E-01        | 9.4E-01  |
| Enterobacterales counts        | C. albicans DNA conc.       | -0.01       | 9.7E-01        | >9.9E-01 |
| Enterobacterales counts        | Metabolome richness         | 0.30        | 1.7E-01        | 7.0E-01  |
| Enterobacterales counts        | Metabolome structure        | -0.11       | 6.1E-01        | 9.4E-01  |
| Enterobacterales counts        | Cholesterol conv. rate      | -0.24       | 2.8E-01        | 7.7E-01  |
| Enterobacterales counts        | BA transf. capacity         | -0.27       | 2.2E-01        | 7.3E-01  |
| Global resistome richness      | B-lactamase activity        | -0.05       | 8.4E-01        | 9.9E-01  |
| Global resistome richness      | B-lactamasome abundance     | -0.15       | 4.9E-01        | 9.4E-01  |
| Global resistome richness      | Phage microbiome richness   | 0.07        | 7.5E-01        | 9.8E-01  |
| Global resistome richness      | Phage microbiome structure  | -0.01       | 9.7E-01        | >9.9E-01 |
| Global resistome richness      | Fungal load                 | -0.45       | <b>4.2E-02</b> | 3.8E-01  |
| Global resistome richness      | Fungal microbiome richness  | -0.06       | 7.8E-01        | 9.8E-01  |
| Global resistome richness      | Fungal microbiome structure | -0.05       | 8.2E-01        | 9.9E-01  |
| Global resistome richness      | C. albicans DNA conc.       | -0.21       | 3.6E-01        | 8.4E-01  |
| Global resistome richness      | Metabolome richness         | 0.23        | 2.9E-01        | 7.9E-01  |
| Global resistome richness      | Metabolome structure        | -0.22       | 3.1E-01        | 8.1E-01  |
| Global resistome richness      | Cholesterol conv. rate      | -0.44       | <b>4.4E-02</b> | 3.8E-01  |
| Global resistome richness      | BA transf. capacity         | 0.06        | 8.1E-01        | 9.9E-01  |
| B-lactamasome abundance        | B-lactamase activity        | -0.15       | 5.0E-01        | 9.4E-01  |
| B-lactamasome abundance        | Phage microbiome richness   | -0.44       | 5.0E-02        | 3.8E-01  |
| B-lactamasome abundance        | Phage microbiome structure  | -0.12       | 6.1E-01        | 9.4E-01  |
| B-lactamasome abundance        | Fungal load                 | 0.08        | 7.2E-01        | 9.8E-01  |
| B-lactamasome abundance        | Fungal microbiome richness  | 0.05        | 8.3E-01        | 9.9E-01  |
| B-lactamasome abundance        | Fungal microbiome structure | 0.22        | 3.3E-01        | 8.1E-01  |
| B-lactamasome abundance        | C. albicans DNA conc.       | 0.15        | 5.0E-01        | 9.4E-01  |
| B-lactamasome abundance        | Metabolome richness         | -0.19       | 4.1E-01        | 8.8E-01  |
| B-lactamasome abundance        | Metabolome structure        | 0.18        | 4.3E-01        | 8.8E-01  |

| Variable 1                  | Variable 2                  | Correlation | P-value        | Q-value  |
|-----------------------------|-----------------------------|-------------|----------------|----------|
| B-lactamasome abundance     | Cholesterol conv. rate      | 0.27        | 2.2E-01        | 7.3E-01  |
| B-lactamasome abundance     | BA transf. capacity         | 0.11        | 6.2E-01        | 9.4E-01  |
| B-lactamase activity        | Phage microbiome richness   | 0.01        | 9.6E-01        | >9.9E-01 |
| B-lactamase activity        | Phage microbiome structure  | 0.09        | 6.9E-01        | 9.7E-01  |
| B-lactamase activity        | Fungal load                 | -0.32       | 1.6E-01        | 7.0E-01  |
| B-lactamase activity        | Fungal microbiome richness  | 0.33        | 1.4E-01        | 7.0E-01  |
| B-lactamase activity        | Fungal microbiome structure | 0.22        | 3.3E-01        | 8.1E-01  |
| B-lactamase activity        | C. albicans DNA conc.       | 0.00        | >9.9E-01       | >9.9E-01 |
| B-lactamase activity        | Metabolome richness         | -0.26       | 2.4E-01        | 7.3E-01  |
| B-lactamase activity        | Metabolome structure        | -0.17       | 4.4E-01        | 8.8E-01  |
| B-lactamase activity        | Cholesterol conv. rate      | -0.08       | 7.2E-01        | 9.8E-01  |
| B-lactamase activity        | BA transf. capacity         | -0.05       | 8.1E-01        | 9.9E-01  |
| Phage microbiome richness   | Phage microbiome structure  | -0.01       | 9.7E-01        | >9.9E-01 |
| Phage microbiome richness   | Fungal load                 | 0.07        | 7.8E-01        | 9.8E-01  |
| Phage microbiome richness   | Fungal microbiome richness  | 0.14        | 5.4E-01        | 9.4E-01  |
| Phage microbiome richness   | Fungal microbiome structure | -0.18       | 4.4E-01        | 8.8E-01  |
| Phage microbiome richness   | C. albicans DNA conc.       | -0.22       | 3.6E-01        | 8.4E-01  |
| Phage microbiome richness   | Metabolome richness         | 0.15        | 5.1E-01        | 9.4E-01  |
| Phage microbiome richness   | Metabolome structure        | -0.25       | 2.7E-01        | 7.7E-01  |
| Phage microbiome richness   | Cholesterol conv. rate      | -0.07       | 7.6E-01        | 9.8E-01  |
| Phage microbiome richness   | BA transf. capacity         | -0.22       | 3.4E-01        | 8.1E-01  |
| Phage microbiome structure  | Fungal load                 | 0.13        | 5.8E-01        | 9.4E-01  |
| Phage microbiome structure  | Fungal microbiome richness  | -0.07       | 7.8E-01        | 9.8E-01  |
| Phage microbiome structure  | Fungal microbiome structure | 0.10        | 6.8E-01        | 9.7E-01  |
| Phage microbiome structure  | C. albicans DNA conc.       | -0.23       | 3.3E-01        | 8.1E-01  |
| Phage microbiome structure  | Metabolome richness         | 0.12        | 6.1E-01        | 9.4E-01  |
| Phage microbiome structure  | Metabolome structure        | 0.20        | 3.9E-01        | 8.5E-01  |
| Phage microbiome structure  | Cholesterol conv. rate      | 0.33        | 1.5E-01        | 7.0E-01  |
| Phage microbiome structure  | BA transf. capacity         | 0.47        | <b>3.4E-02</b> | 3.8E-01  |
| Fungal load                 | Fungal microbiome richness  | 0.07        | 7.5E-01        | 9.8E-01  |
| Fungal load                 | Fungal microbiome structure | 0.02        | 9.3E-01        | >9.9E-01 |
| Fungal load                 | C. albicans DNA conc.       | 0.30        | 1.8E-01        | 7.0E-01  |
| Fungal load                 | Metabolome richness         | 0.42        | 5.6E-02        | 3.8E-01  |
| Fungal load                 | Metabolome structure        | 0.17        | 4.5E-01        | 8.9E-01  |
| Fungal load                 | Cholesterol conv. rate      | 0.24        | 3.0E-01        | 7.9E-01  |
| Fungal load                 | BA transf. capacity         | 0.12        | 6.1E-01        | 9.4E-01  |
| Fungal microbiome richness  | Fungal microbiome structure | 0.29        | 2.0E-01        | 7.0E-01  |
| Fungal microbiome richness  | C. albicans DNA conc.       | 0.29        | 2.0E-01        | 7.0E-01  |
| Fungal microbiome richness  | Metabolome richness         | 0.00        | 9.9E-01        | >9.9E-01 |
| Fungal microbiome richness  | Metabolome structure        | 0.18        | 4.2E-01        | 8.8E-01  |
| Fungal microbiome richness  | Cholesterol conv. rate      | 0.13        | 5.8E-01        | 9.4E-01  |
| Fungal microbiome richness  | BA transf. capacity         | 0.24        | 2.8E-01        | 7.7E-01  |
| Fungal microbiome structure | C. albicans DNA conc.       | 0.15        | 5.2E-01        | 9.4E-01  |
| Fungal microbiome structure | Metabolome richness         | 0.01        | 9.8E-01        | >9.9E-01 |

Supplementary appendix for :  
d'Humières, C. et al. Perturbation and resilience of the gut microbiome up to three months after  $\beta$ -lactams exposure in healthy volunteers suggest an important role of microbial  $\beta$ -lactamases

---

| <b>Variable 1</b>           | <b>Variable 2</b>      | <b>Correlation</b> | <b>P-value</b> | <b>Q-value</b> |
|-----------------------------|------------------------|--------------------|----------------|----------------|
| Fungal microbiome structure | Metabolome structure   | 0.51               | <b>1.5E-02</b> | 3.3E-01        |
| Fungal microbiome structure | Cholesterol conv. rate | 0.29               | 1.9E-01        | 7.0E-01        |
| Fungal microbiome structure | BA transf. capacity    | 0.44               | <b>4.0E-02</b> | 3.8E-01        |
| C. albicans DNA conc.       | Metabolome richness    | -0.10              | 6.7E-01        | 9.7E-01        |
| C. albicans DNA conc.       | Metabolome structure   | -0.07              | 7.6E-01        | 9.8E-01        |
| C. albicans DNA conc.       | Cholesterol conv. rate | 0.02               | 9.5E-01        | >9.9E-01       |
| C. albicans DNA conc.       | BA transf. capacity    | -0.17              | 4.7E-01        | 9.1E-01        |
| Metabolome richness         | Metabolome structure   | -0.01              | 9.8E-01        | >9.9E-01       |
| Metabolome richness         | Cholesterol conv. rate | -0.10              | 6.6E-01        | 9.7E-01        |
| Metabolome richness         | BA transf. capacity    | 0.10               | 6.7E-01        | 9.7E-01        |
| Metabolome structure        | Cholesterol conv. rate | 0.71               | <b>3.5E-04</b> | <b>4.7E-02</b> |
| Metabolome structure        | BA transf. capacity    | 0.58               | <b>5.5E-03</b> | 2.3E-01        |
| Cholesterol conv. rate      | BA transf. capacity    | 0.37               | 9.3E-02        | 5.6E-01        |

**Supplementary Table S4. Spearman’s correlations of the maximal resiliences of studied gut microbiota and stool components in the 22 healthy volunteers included in the CEREMI trial.**

P-values corresponds to the uncorrected test of the Spearman’s correlation coefficient to 0. Q-value corresponds to the test of the Spearman’s correlation coefficient to 0 after Benjamini & Hochberg’s correction. P-values in bold represent values below 0.05. Conc., concentration; Cholesterol conv. rate, Cholesterol conversion rate; BA transf. Capacity, Bile acids transformation capacity.

| Variable 1                     | Variable 2                     | Correlation | P-value        | Q-value |
|--------------------------------|--------------------------------|-------------|----------------|---------|
| Bacterial counts               | Bacterial microbiome richness  | 0.46        | <b>3.7E-02</b> | 7.3E-01 |
| Bacterial counts               | Bacterial microbiome structure | 0.48        | <b>3.0E-02</b> | 7.3E-01 |
| Bacterial counts               | Enterobacterales counts        | -0.24       | 3.0E-01        | 9.0E-01 |
| Bacterial counts               | Global resistome richness      | 0.35        | 1.3E-01        | 7.8E-01 |
| Bacterial counts               | B-lactamasome abundance        | -0.16       | 4.8E-01        | 9.0E-01 |
| Bacterial counts               | B-lactamase activity           | 0.20        | 4.0E-01        | 9.0E-01 |
| Bacterial counts               | Phage microbiome richness      | -0.14       | 6.4E-01        | 9.0E-01 |
| Bacterial counts               | Phage microbiome structure     | 0.41        | 7.1E-02        | 7.4E-01 |
| Bacterial counts               | Fungal load                    | 0.11        | 6.5E-01        | 9.0E-01 |
| Bacterial counts               | Fungal microbiome richness     | 0.23        | 3.3E-01        | 9.0E-01 |
| Bacterial counts               | Fungal microbiome structure    | 0.09        | 7.0E-01        | 9.0E-01 |
| Bacterial counts               | C. albicans DNA conc.          | 0.07        | 7.8E-01        | 9.0E-01 |
| Bacterial counts               | Metabolome richness            | -0.20       | 4.0E-01        | 9.0E-01 |
| Bacterial counts               | Metabolome structure           | -0.09       | 7.1E-01        | 9.0E-01 |
| Bacterial counts               | Cholesterol conv. rate         | 0.06        | 8.1E-01        | 9.0E-01 |
| Bacterial counts               | BA transf. capacity            | -0.07       | 7.7E-01        | 9.0E-01 |
| Bacterial microbiome richness  | Bacterial microbiome structure | 0.08        | 7.2E-01        | 9.0E-01 |
| Bacterial microbiome richness  | Enterobacterales counts        | -0.35       | 1.2E-01        | 7.8E-01 |
| Bacterial microbiome richness  | Global resistome richness      | 0.31        | 1.7E-01        | 8.7E-01 |
| Bacterial microbiome richness  | B-lactamasome abundance        | -0.10       | 6.6E-01        | 9.0E-01 |
| Bacterial microbiome richness  | B-lactamase activity           | 0.45        | <b>3.7E-02</b> | 7.3E-01 |
| Bacterial microbiome richness  | Phage microbiome richness      | -0.22       | 4.4E-01        | 9.0E-01 |
| Bacterial microbiome richness  | Phage microbiome structure     | -0.14       | 5.5E-01        | 9.0E-01 |
| Bacterial microbiome richness  | Fungal load                    | 0.17        | 4.5E-01        | 9.0E-01 |
| Bacterial microbiome richness  | Fungal microbiome richness     | 0.18        | 4.2E-01        | 9.0E-01 |
| Bacterial microbiome richness  | Fungal microbiome structure    | 0.42        | 5.7E-02        | 7.4E-01 |
| Bacterial microbiome richness  | C. albicans DNA conc.          | -0.07       | 7.5E-01        | 9.0E-01 |
| Bacterial microbiome richness  | Metabolome richness            | -0.38       | 8.9E-02        | 7.8E-01 |
| Bacterial microbiome richness  | Metabolome structure           | -0.06       | 8.1E-01        | 9.0E-01 |
| Bacterial microbiome richness  | Cholesterol conv. rate         | 0.19        | 4.0E-01        | 9.0E-01 |
| Bacterial microbiome richness  | BA transf. capacity            | -0.31       | 1.8E-01        | 8.9E-01 |
| Bacterial microbiome structure | Enterobacterales counts        | -0.17       | 4.4E-01        | 9.0E-01 |
| Bacterial microbiome structure | Global resistome richness      | 0.16        | 4.6E-01        | 9.0E-01 |
| Bacterial microbiome structure | B-lactamasome abundance        | 0.04        | 8.8E-01        | 9.3E-01 |
| Bacterial microbiome structure | B-lactamase activity           | -0.13       | 5.7E-01        | 9.0E-01 |
| Bacterial microbiome structure | Phage microbiome richness      | -0.08       | 7.8E-01        | 9.0E-01 |

| Variable 1                     | Variable 2                  | Correlation | P-value        | Q-value |
|--------------------------------|-----------------------------|-------------|----------------|---------|
| Bacterial microbiome structure | Phage microbiome structure  | 0.53        | <b>1.4E-02</b> | 6.9E-01 |
| Bacterial microbiome structure | Fungal load                 | 0.07        | 7.6E-01        | 9.0E-01 |
| Bacterial microbiome structure | Fungal microbiome richness  | -0.15       | 5.1E-01        | 9.0E-01 |
| Bacterial microbiome structure | Fungal microbiome structure | 0.05        | 8.5E-01        | 9.2E-01 |
| Bacterial microbiome structure | C. albicans DNA conc.       | -0.12       | 6.1E-01        | 9.0E-01 |
| Bacterial microbiome structure | Metabolome richness         | -0.10       | 6.7E-01        | 9.0E-01 |
| Bacterial microbiome structure | Metabolome structure        | 0.09        | 7.0E-01        | 9.0E-01 |
| Bacterial microbiome structure | Cholesterol conv. rate      | -0.06       | 7.9E-01        | 9.0E-01 |
| Bacterial microbiome structure | BA transf. capacity         | -0.16       | 4.8E-01        | 9.0E-01 |
| Enterobacterales counts        | Phage microbiome richness   | -0.24       | 4.2E-01        | 9.0E-01 |
| Enterobacterales counts        | Phage microbiome structure  | 0.19        | 4.1E-01        | 9.0E-01 |
| Enterobacterales counts        | Global resistome richness   | -0.40       | 6.6E-02        | 7.4E-01 |
| Enterobacterales counts        | B-lactamase activity        | -0.10       | 6.5E-01        | 9.0E-01 |
| Enterobacterales counts        | B-lactamasome abundance     | 0.52        | <b>1.5E-02</b> | 6.9E-01 |
| Enterobacterales counts        | Fungal load                 | -0.20       | 3.8E-01        | 9.0E-01 |
| Enterobacterales counts        | Fungal microbiome richness  | -0.11       | 6.3E-01        | 9.0E-01 |
| Enterobacterales counts        | Fungal microbiome structure | -0.32       | 1.6E-01        | 8.7E-01 |
| Enterobacterales counts        | C. albicans DNA conc.       | -0.02       | 9.4E-01        | 9.4E-01 |
| Enterobacterales counts        | Metabolome richness         | 0.17        | 4.7E-01        | 9.0E-01 |
| Enterobacterales counts        | Metabolome structure        | -0.55       | <b>1.1E-02</b> | 6.9E-01 |
| Enterobacterales counts        | Cholesterol conv. rate      | -0.17       | 4.6E-01        | 9.0E-01 |
| Enterobacterales counts        | BA transf. capacity         | -0.11       | 6.4E-01        | 9.0E-01 |
| Global resistome richness      | B-lactamase activity        | -0.18       | 4.3E-01        | 9.0E-01 |
| Global resistome richness      | B-lactamasome abundance     | -0.22       | 3.3E-01        | 9.0E-01 |
| Global resistome richness      | Phage microbiome richness   | -0.32       | 2.7E-01        | 9.0E-01 |
| Global resistome richness      | Phage microbiome structure  | 0.09        | 6.9E-01        | 9.0E-01 |
| Global resistome richness      | Fungal load                 | -0.04       | 8.5E-01        | 9.2E-01 |
| Global resistome richness      | Fungal microbiome richness  | 0.21        | 3.6E-01        | 9.0E-01 |
| Global resistome richness      | Fungal microbiome structure | 0.19        | 4.0E-01        | 9.0E-01 |
| Global resistome richness      | C. albicans DNA conc.       | -0.11       | 6.4E-01        | 9.0E-01 |
| Global resistome richness      | Metabolome richness         | -0.23       | 3.1E-01        | 9.0E-01 |
| Global resistome richness      | Metabolome structure        | 0.12        | 5.9E-01        | 9.0E-01 |
| Global resistome richness      | Cholesterol conv. rate      | 0.25        | 2.7E-01        | 9.0E-01 |
| Global resistome richness      | BA transf. capacity         | 0.16        | 4.8E-01        | 9.0E-01 |
| B-lactamasome abundance        | B-lactamase activity        | -0.11       | 6.1E-01        | 9.0E-01 |
| B-lactamasome abundance        | Phage microbiome richness   | 0.05        | 8.8E-01        | 9.3E-01 |
| B-lactamasome abundance        | Phage microbiome structure  | 0.05        | 8.2E-01        | 9.1E-01 |
| B-lactamasome abundance        | Fungal load                 | -0.19       | 4.1E-01        | 9.0E-01 |
| B-lactamasome abundance        | Fungal microbiome richness  | 0.18        | 4.4E-01        | 9.0E-01 |
| B-lactamasome abundance        | Fungal microbiome structure | -0.11       | 6.4E-01        | 9.0E-01 |
| B-lactamasome abundance        | C. albicans DNA conc.       | 0.26        | 2.6E-01        | 9.0E-01 |
| B-lactamasome abundance        | Metabolome richness         | 0.22        | 3.4E-01        | 9.0E-01 |
| B-lactamasome abundance        | Metabolome structure        | -0.23       | 3.2E-01        | 9.0E-01 |
| B-lactamasome abundance        | Cholesterol conv. rate      | -0.47       | <b>3.3E-02</b> | 7.3E-01 |

| Variable 1                  | Variable 2                  | Correlation | P-value | Q-value |
|-----------------------------|-----------------------------|-------------|---------|---------|
| B-lactamasome abundance     | BA transf. capacity         | 0.26        | 2.6E-01 | 9.0E-01 |
| B-lactamase activity        | Phage microbiome richness   | 0.17        | 5.5E-01 | 9.0E-01 |
| B-lactamase activity        | Phage microbiome structure  | -0.22       | 3.4E-01 | 9.0E-01 |
| B-lactamase activity        | Fungal load                 | 0.20        | 3.8E-01 | 9.0E-01 |
| B-lactamase activity        | Fungal microbiome richness  | -0.03       | 9.0E-01 | 9.4E-01 |
| B-lactamase activity        | Fungal microbiome structure | 0.07        | 7.8E-01 | 9.0E-01 |
| B-lactamase activity        | C. albicans DNA conc.       | -0.37       | 9.9E-02 | 7.8E-01 |
| B-lactamase activity        | Metabolome richness         | -0.18       | 4.4E-01 | 9.0E-01 |
| B-lactamase activity        | Metabolome structure        | 0.08        | 7.4E-01 | 9.0E-01 |
| B-lactamase activity        | Cholesterol conv. rate      | -0.27       | 2.4E-01 | 9.0E-01 |
| B-lactamase activity        | BA transf. capacity         | -0.35       | 1.2E-01 | 7.8E-01 |
| Phage microbiome richness   | Phage microbiome structure  | -0.39       | 1.7E-01 | 8.7E-01 |
| Phage microbiome richness   | Fungal load                 | 0.17        | 5.6E-01 | 9.0E-01 |
| Phage microbiome richness   | Fungal microbiome richness  | -0.09       | 7.7E-01 | 9.0E-01 |
| Phage microbiome richness   | Fungal microbiome structure | -0.03       | 9.3E-01 | 9.4E-01 |
| Phage microbiome richness   | C. albicans DNA conc.       | 0.31        | 2.7E-01 | 9.0E-01 |
| Phage microbiome richness   | Metabolome richness         | 0.45        | 1.1E-01 | 7.8E-01 |
| Phage microbiome richness   | Metabolome structure        | -0.17       | 5.5E-01 | 9.0E-01 |
| Phage microbiome richness   | Cholesterol conv. rate      | -0.52       | 6.2E-02 | 7.4E-01 |
| Phage microbiome richness   | BA transf. capacity         | 0.23        | 4.4E-01 | 9.0E-01 |
| Phage microbiome structure  | Fungal load                 | 0.13        | 5.7E-01 | 9.0E-01 |
| Phage microbiome structure  | Fungal microbiome richness  | -0.27       | 2.5E-01 | 9.0E-01 |
| Phage microbiome structure  | Fungal microbiome structure | -0.17       | 4.8E-01 | 9.0E-01 |
| Phage microbiome structure  | C. albicans DNA conc.       | 0.04        | 8.7E-01 | 9.3E-01 |
| Phage microbiome structure  | Metabolome richness         | 0.07        | 7.7E-01 | 9.0E-01 |
| Phage microbiome structure  | Metabolome structure        | 0.02        | 9.4E-01 | 9.4E-01 |
| Phage microbiome structure  | Cholesterol conv. rate      | -0.02       | 9.3E-01 | 9.4E-01 |
| Phage microbiome structure  | BA transf. capacity         | -0.15       | 5.4E-01 | 9.0E-01 |
| Fungal load                 | Fungal microbiome richness  | 0.09        | 6.9E-01 | 9.0E-01 |
| Fungal load                 | Fungal microbiome structure | 0.16        | 4.8E-01 | 9.0E-01 |
| Fungal load                 | C. albicans DNA conc.       | -0.40       | 7.0E-02 | 7.4E-01 |
| Fungal load                 | Metabolome richness         | 0.09        | 7.1E-01 | 9.0E-01 |
| Fungal load                 | Metabolome structure        | 0.08        | 7.2E-01 | 9.0E-01 |
| Fungal load                 | Cholesterol conv. rate      | -0.23       | 3.2E-01 | 9.0E-01 |
| Fungal load                 | BA transf. capacity         | 0.28        | 2.2E-01 | 9.0E-01 |
| Fungal microbiome richness  | Fungal microbiome structure | 0.20        | 3.9E-01 | 9.0E-01 |
| Fungal microbiome richness  | C. albicans DNA conc.       | 0.19        | 4.1E-01 | 9.0E-01 |
| Fungal microbiome richness  | Metabolome richness         | -0.16       | 5.0E-01 | 9.0E-01 |
| Fungal microbiome richness  | Metabolome structure        | -0.32       | 1.5E-01 | 8.7E-01 |
| Fungal microbiome richness  | Cholesterol conv. rate      | -0.38       | 9.2E-02 | 7.8E-01 |
| Fungal microbiome richness  | BA transf. capacity         | 0.39        | 8.4E-02 | 7.8E-01 |
| Fungal microbiome structure | C. albicans DNA conc.       | 0.04        | 8.5E-01 | 9.2E-01 |
| Fungal microbiome structure | Metabolome richness         | 0.06        | 8.1E-01 | 9.0E-01 |
| Fungal microbiome structure | Metabolome structure        | 0.10        | 6.7E-01 | 9.0E-01 |



Supplementary appendix for :  
d'Humières, C. et al. Perturbation and resilience of the gut microbiome up to three months after  $\beta$ -lactams exposure in healthy volunteers suggest an important role of microbial  $\beta$ -lactamases

---

| <b>Variable 1</b>           | <b>Variable 2</b>      | <b>Correlation</b> | <b>P-value</b> | <b>Q-value</b> |
|-----------------------------|------------------------|--------------------|----------------|----------------|
| Fungal microbiome structure | Cholesterol conv. rate | 0.13               | 5.8E-01        | 9.0E-01        |
| Fungal microbiome structure | BA transf. capacity    | -0.10              | 6.8E-01        | 9.0E-01        |
| C. albicans DNA conc.       | Metabolome richness    | 0.41               | 6.2E-02        | 7.4E-01        |
| C. albicans DNA conc.       | Metabolome structure   | -0.02              | 9.4E-01        | 9.4E-01        |
| C. albicans DNA conc.       | Cholesterol conv. rate | 0.10               | 6.5E-01        | 9.0E-01        |
| C. albicans DNA conc.       | BA transf. capacity    | 0.22               | 3.4E-01        | 9.0E-01        |
| Metabolome richness         | Metabolome structure   | 0.11               | 6.4E-01        | 9.0E-01        |
| Metabolome richness         | Cholesterol conv. rate | -0.03              | 9.1E-01        | 9.4E-01        |
| Metabolome richness         | BA transf. capacity    | 0.14               | 5.4E-01        | 9.0E-01        |
| Metabolome structure        | Cholesterol conv. rate | 0.14               | 5.4E-01        | 9.0E-01        |
| Metabolome structure        | BA transf. capacity    | 0.11               | 6.5E-01        | 9.0E-01        |
| Cholesterol conv. rate      | BA transf. capacity    | -0.36              | 1.1E-01        | 7.8E-01        |

**Supplementary Table S5. Spearman’s correlations between the baseline characteristics and the maximal perturbations of the studied gut microbiota and gut components in the 22 healthy volunteers included in the CEREMI trial.**

P-values corresponds to the uncorrected test of the Spearman’s correlation coefficient to 0. Q-value corresponds to the test of the Spearman’s correlation coefficient to 0 after Benjamini & Hochberg’s correction. P-values in bold represent values below 0.05. Conc., concentration; Cholesterol conv. rate, Cholesterol conversion rate; BA transf. Capacity, Bile acids transformation capacity.

| Baseline variable             | Perturbation variable          | Correlation | P-value        | Q-value  |
|-------------------------------|--------------------------------|-------------|----------------|----------|
| Bacterial counts              | Bacterial counts               | 0.18        | 4.2E-01        | 9.9E-01  |
| Bacterial counts              | Bacterial microbiome richness  | -0.02       | 9.2E-01        | >9.9E-01 |
| Bacterial counts              | Bacterial microbiome structure | 0.01        | 9.6E-01        | >9.9E-01 |
| Bacterial counts              | Enterobacterales counts        | 0.14        | 5.4E-01        | 9.9E-01  |
| Bacterial counts              | Global resistome richness      | -0.22       | 3.3E-01        | 9.9E-01  |
| Bacterial counts              | B-lactamasome abundance        | 0.41        | 6.2E-02        | 9.9E-01  |
| Bacterial counts              | B-lactamase activity           | 0.21        | 3.5E-01        | 9.9E-01  |
| Bacterial counts              | Phage microbiome richness      | 0.04        | 8.7E-01        | 9.9E-01  |
| Bacterial counts              | Phage microbiome structure     | -0.27       | 2.3E-01        | 9.9E-01  |
| Bacterial counts              | Fungal load                    | 0.05        | 8.3E-01        | 9.9E-01  |
| Bacterial counts              | Fungal microbiome richness     | 0.04        | 8.7E-01        | 9.9E-01  |
| Bacterial counts              | Fungal microbiome structure    | -0.19       | 4.0E-01        | 9.9E-01  |
| Bacterial counts              | C. albicans DNA conc.          | -0.23       | 3.2E-01        | 9.9E-01  |
| Bacterial counts              | Metabolome richness            | -0.23       | 3.0E-01        | 9.9E-01  |
| Bacterial counts              | Metabolome structure           | -0.03       | 8.9E-01        | 9.9E-01  |
| Bacterial counts              | Cholesterol conv. rate         | 0.07        | 7.5E-01        | 9.9E-01  |
| Bacterial counts              | BA transf. capacity            | 0.01        | 9.7E-01        | >9.9E-01 |
| Bacterial microbiome richness | Bacterial counts               | -0.23       | 2.9E-01        | 9.9E-01  |
| Bacterial microbiome richness | Bacterial microbiome richness  | -0.11       | 6.1E-01        | 9.9E-01  |
| Bacterial microbiome richness | Bacterial microbiome structure | -0.08       | 7.3E-01        | 9.9E-01  |
| Bacterial microbiome richness | Enterobacterales counts        | -0.14       | 5.3E-01        | 9.9E-01  |
| Bacterial microbiome richness | Global resistome richness      | -0.27       | 2.2E-01        | 9.9E-01  |
| Bacterial microbiome richness | B-lactamasome abundance        | 0.22        | 3.3E-01        | 9.9E-01  |
| Bacterial microbiome richness | B-lactamase activity           | -0.35       | 1.1E-01        | 9.9E-01  |
| Bacterial microbiome richness | Phage microbiome richness      | 0.18        | 4.4E-01        | 9.9E-01  |
| Bacterial microbiome richness | Phage microbiome structure     | -0.04       | 8.5E-01        | 9.9E-01  |
| Bacterial microbiome richness | Fungal load                    | 0.00        | 9.8E-01        | >9.9E-01 |
| Bacterial microbiome richness | Fungal microbiome richness     | -0.18       | 4.2E-01        | 9.9E-01  |
| Bacterial microbiome richness | Fungal microbiome structure    | -0.05       | 8.2E-01        | 9.9E-01  |
| Bacterial microbiome richness | C. albicans DNA conc.          | -0.37       | 1.0E-01        | 9.9E-01  |
| Bacterial microbiome richness | Metabolome richness            | -0.10       | 6.6E-01        | 9.9E-01  |
| Bacterial microbiome richness | Metabolome structure           | 0.18        | 4.1E-01        | 9.9E-01  |
| Bacterial microbiome richness | Cholesterol conv. rate         | 0.44        | <b>4.2E-02</b> | 9.9E-01  |
| Bacterial microbiome richness | BA transf. capacity            | 0.12        | 6.1E-01        | 9.9E-01  |
| Enterobacterales counts       | Bacterial counts               | 0.05        | 8.2E-01        | 9.9E-01  |

| Baseline variable         | Perturbation variable          | Correlation | P-value        | Q-value |
|---------------------------|--------------------------------|-------------|----------------|---------|
| Enterobacterales counts   | Bacterial microbiome richness  | 0.29        | 2.0E-01        | 9.9E-01 |
| Enterobacterales counts   | Bacterial microbiome structure | -0.33       | 1.4E-01        | 9.9E-01 |
| Enterobacterales counts   | Enterobacterales counts        | 0.18        | 4.3E-01        | 9.9E-01 |
| Enterobacterales counts   | Global resistome richness      | 0.20        | 3.8E-01        | 9.9E-01 |
| Enterobacterales counts   | B-lactamasome abundance        | 0.05        | 8.2E-01        | 9.9E-01 |
| Enterobacterales counts   | B-lactamase activity           | 0.10        | 6.6E-01        | 9.9E-01 |
| Enterobacterales counts   | Phage microbiome richness      | 0.11        | 6.4E-01        | 9.9E-01 |
| Enterobacterales counts   | Phage microbiome structure     | -0.08       | 7.4E-01        | 9.9E-01 |
| Enterobacterales counts   | Fungal load                    | -0.32       | 1.6E-01        | 9.9E-01 |
| Enterobacterales counts   | Fungal microbiome richness     | 0.12        | 5.9E-01        | 9.9E-01 |
| Enterobacterales counts   | Fungal microbiome structure    | -0.18       | 4.4E-01        | 9.9E-01 |
| Enterobacterales counts   | C. albicans DNA conc.          | -0.17       | 4.6E-01        | 9.9E-01 |
| Enterobacterales counts   | Metabolome richness            | -0.21       | 3.5E-01        | 9.9E-01 |
| Enterobacterales counts   | Metabolome structure           | -0.16       | 4.8E-01        | 9.9E-01 |
| Enterobacterales counts   | Cholesterol conv. rate         | -0.24       | 2.9E-01        | 9.9E-01 |
| Enterobacterales counts   | BA transf. capacity            | -0.06       | 8.0E-01        | 9.9E-01 |
| Global resistome richness | Bacterial counts               | -0.16       | 4.8E-01        | 9.9E-01 |
| Global resistome richness | Bacterial microbiome richness  | -0.06       | 7.8E-01        | 9.9E-01 |
| Global resistome richness | Bacterial microbiome structure | 0.07        | 7.4E-01        | 9.9E-01 |
| Global resistome richness | Enterobacterales counts        | -0.16       | 4.7E-01        | 9.9E-01 |
| Global resistome richness | Global resistome richness      | -0.19       | 4.0E-01        | 9.9E-01 |
| Global resistome richness | B-lactamasome abundance        | 0.15        | 5.1E-01        | 9.9E-01 |
| Global resistome richness | B-lactamase activity           | -0.22       | 3.2E-01        | 9.9E-01 |
| Global resistome richness | Phage microbiome richness      | 0.21        | 3.6E-01        | 9.9E-01 |
| Global resistome richness | Phage microbiome structure     | 0.09        | 7.0E-01        | 9.9E-01 |
| Global resistome richness | Fungal load                    | -0.06       | 8.0E-01        | 9.9E-01 |
| Global resistome richness | Fungal microbiome richness     | -0.16       | 4.8E-01        | 9.9E-01 |
| Global resistome richness | Fungal microbiome structure    | -0.12       | 5.9E-01        | 9.9E-01 |
| Global resistome richness | C. albicans DNA conc.          | -0.57       | <b>7.5E-03</b> | 6.5E-01 |
| Global resistome richness | Metabolome richness            | -0.17       | 4.6E-01        | 9.9E-01 |
| Global resistome richness | Metabolome structure           | 0.36        | 1.0E-01        | 9.9E-01 |
| Global resistome richness | Cholesterol conv. rate         | 0.54        | <b>8.8E-03</b> | 6.5E-01 |
| Global resistome richness | BA transf. capacity            | 0.24        | 2.8E-01        | 9.9E-01 |
| B-lactamasome abundance   | Bacterial counts               | -0.07       | 7.5E-01        | 9.9E-01 |
| B-lactamasome abundance   | Bacterial microbiome richness  | 0.15        | 5.1E-01        | 9.9E-01 |
| B-lactamasome abundance   | Bacterial microbiome structure | -0.13       | 5.5E-01        | 9.9E-01 |
| B-lactamasome abundance   | Enterobacterales counts        | 0.15        | 4.9E-01        | 9.9E-01 |
| B-lactamasome abundance   | Global resistome richness      | 0.35        | 1.1E-01        | 9.9E-01 |
| B-lactamasome abundance   | B-lactamasome abundance        | -0.16       | 4.8E-01        | 9.9E-01 |
| B-lactamasome abundance   | B-lactamase activity           | 0.07        | 7.7E-01        | 9.9E-01 |
| B-lactamasome abundance   | Phage microbiome richness      | 0.14        | 5.6E-01        | 9.9E-01 |
| B-lactamasome abundance   | Phage microbiome structure     | -0.04       | 8.5E-01        | 9.9E-01 |
| B-lactamasome abundance   | Fungal load                    | -0.04       | 8.7E-01        | 9.9E-01 |
| B-lactamasome abundance   | Fungal microbiome richness     | 0.34        | 1.2E-01        | 9.9E-01 |

| Baseline variable         | Perturbation variable          | Correlation | P-value        | Q-value  |
|---------------------------|--------------------------------|-------------|----------------|----------|
| B-lactamasome abundance   | Fungal microbiome structure    | 0.04        | 8.5E-01        | 9.9E-01  |
| B-lactamasome abundance   | C. albicans DNA conc.          | 0.32        | 1.5E-01        | 9.9E-01  |
| B-lactamasome abundance   | Metabolome richness            | -0.01       | 9.8E-01        | >9.9E-01 |
| B-lactamasome abundance   | Metabolome structure           | -0.09       | 6.9E-01        | 9.9E-01  |
| B-lactamasome abundance   | Cholesterol conv. rate         | -0.28       | 2.0E-01        | 9.9E-01  |
| B-lactamasome abundance   | BA transf. capacity            | -0.02       | 9.3E-01        | >9.9E-01 |
| B-lactamase activity      | Bacterial counts               | -0.27       | 2.2E-01        | 9.9E-01  |
| B-lactamase activity      | Bacterial microbiome richness  | -0.25       | 2.6E-01        | 9.9E-01  |
| B-lactamase activity      | Bacterial microbiome structure | -0.26       | 2.4E-01        | 9.9E-01  |
| B-lactamase activity      | Enterobacterales counts        | -0.26       | 2.4E-01        | 9.9E-01  |
| B-lactamase activity      | Global resistome richness      | -0.41       | 6.0E-02        | 9.9E-01  |
| B-lactamase activity      | B-lactamasome abundance        | 0.09        | 6.9E-01        | 9.9E-01  |
| B-lactamase activity      | B-lactamase activity           | -0.14       | 5.3E-01        | 9.9E-01  |
| B-lactamase activity      | Phage microbiome richness      | 0.05        | 8.4E-01        | 9.9E-01  |
| B-lactamase activity      | Phage microbiome structure     | 0.10        | 6.6E-01        | 9.9E-01  |
| B-lactamase activity      | Fungal load                    | 0.29        | 2.1E-01        | 9.9E-01  |
| B-lactamase activity      | Fungal microbiome richness     | 0.07        | 7.4E-01        | 9.9E-01  |
| B-lactamase activity      | Fungal microbiome structure    | -0.36       | 9.6E-02        | 9.9E-01  |
| B-lactamase activity      | C. albicans DNA conc.          | -0.06       | 8.1E-01        | 9.9E-01  |
| B-lactamase activity      | Metabolome richness            | -0.24       | 2.7E-01        | 9.9E-01  |
| B-lactamase activity      | Metabolome structure           | 0.07        | 7.6E-01        | 9.9E-01  |
| B-lactamase activity      | Cholesterol conv. rate         | 0.30        | 1.8E-01        | 9.9E-01  |
| B-lactamase activity      | BA transf. capacity            | 0.00        | 9.9E-01        | >9.9E-01 |
| Phage microbiome richness | Bacterial counts               | -0.31       | 1.7E-01        | 9.9E-01  |
| Phage microbiome richness | Bacterial microbiome richness  | -0.26       | 2.6E-01        | 9.9E-01  |
| Phage microbiome richness | Bacterial microbiome structure | 0.03        | 8.9E-01        | 9.9E-01  |
| Phage microbiome richness | Enterobacterales counts        | -0.34       | 1.3E-01        | 9.9E-01  |
| Phage microbiome richness | Global resistome richness      | -0.18       | 4.4E-01        | 9.9E-01  |
| Phage microbiome richness | B-lactamasome abundance        | -0.11       | 6.2E-01        | 9.9E-01  |
| Phage microbiome richness | B-lactamase activity           | -0.02       | 9.2E-01        | >9.9E-01 |
| Phage microbiome richness | Phage microbiome richness      | 0.05        | 8.1E-01        | 9.9E-01  |
| Phage microbiome richness | Phage microbiome structure     | 0.20        | 3.8E-01        | 9.9E-01  |
| Phage microbiome richness | Fungal load                    | 0.08        | 7.4E-01        | 9.9E-01  |
| Phage microbiome richness | Fungal microbiome richness     | -0.46       | <b>3.5E-02</b> | 9.9E-01  |
| Phage microbiome richness | Fungal microbiome structure    | -0.26       | 2.6E-01        | 9.9E-01  |
| Phage microbiome richness | C. albicans DNA conc.          | -0.22       | 3.4E-01        | 9.9E-01  |
| Phage microbiome richness | Metabolome richness            | -0.18       | 4.5E-01        | 9.9E-01  |
| Phage microbiome richness | Metabolome structure           | -0.21       | 3.5E-01        | 9.9E-01  |
| Phage microbiome richness | Cholesterol conv. rate         | 0.19        | 4.0E-01        | 9.9E-01  |
| Phage microbiome richness | BA transf. capacity            | -0.10       | 6.7E-01        | 9.9E-01  |
| Fungal load               | Bacterial counts               | 0.13        | 5.9E-01        | 9.9E-01  |
| Fungal load               | Bacterial microbiome richness  | -0.03       | 8.9E-01        | 9.9E-01  |
| Fungal load               | Bacterial microbiome structure | 0.09        | 7.1E-01        | 9.9E-01  |
| Fungal load               | Enterobacterales counts        | 0.21        | 3.5E-01        | 9.9E-01  |

| Baseline variable          | Perturbation variable          | Correlation | P-value        | Q-value  |
|----------------------------|--------------------------------|-------------|----------------|----------|
| Fungal load                | Global resistome richness      | 0.06        | 8.1E-01        | 9.9E-01  |
| Fungal load                | B-lactamasome abundance        | 0.39        | 8.4E-02        | 9.9E-01  |
| Fungal load                | B-lactamase activity           | -0.08       | 7.5E-01        | 9.9E-01  |
| Fungal load                | Phage microbiome richness      | -0.21       | 3.8E-01        | 9.9E-01  |
| Fungal load                | Phage microbiome structure     | -0.02       | 9.2E-01        | >9.9E-01 |
| Fungal load                | Fungal load                    | 0.05        | 8.5E-01        | 9.9E-01  |
| Fungal load                | Fungal microbiome richness     | -0.14       | 5.5E-01        | 9.9E-01  |
| Fungal load                | Fungal microbiome structure    | -0.02       | 9.3E-01        | >9.9E-01 |
| Fungal load                | C. albicans DNA conc.          | -0.04       | 8.8E-01        | 9.9E-01  |
| Fungal load                | Metabolome richness            | -0.04       | 8.7E-01        | 9.9E-01  |
| Fungal load                | Metabolome structure           | -0.01       | 9.6E-01        | >9.9E-01 |
| Fungal load                | Cholesterol conv. rate         | 0.26        | 2.5E-01        | 9.9E-01  |
| Fungal load                | BA transf. capacity            | -0.18       | 4.2E-01        | 9.9E-01  |
| Fungal microbiome richness | Bacterial counts               | -0.07       | 7.6E-01        | 9.9E-01  |
| Fungal microbiome richness | Bacterial microbiome richness  | 0.01        | 9.8E-01        | >9.9E-01 |
| Fungal microbiome richness | Bacterial microbiome structure | 0.08        | 7.1E-01        | 9.9E-01  |
| Fungal microbiome richness | Enterobacterales counts        | -0.12       | 6.0E-01        | 9.9E-01  |
| Fungal microbiome richness | Global resistome richness      | -0.01       | 9.7E-01        | >9.9E-01 |
| Fungal microbiome richness | B-lactamasome abundance        | 0.17        | 4.4E-01        | 9.9E-01  |
| Fungal microbiome richness | B-lactamase activity           | 0.30        | 1.8E-01        | 9.9E-01  |
| Fungal microbiome richness | Phage microbiome richness      | -0.11       | 6.4E-01        | 9.9E-01  |
| Fungal microbiome richness | Phage microbiome structure     | 0.00        | >9.9E-01       | >9.9E-01 |
| Fungal microbiome richness | Fungal load                    | -0.20       | 3.8E-01        | 9.9E-01  |
| Fungal microbiome richness | Fungal microbiome richness     | 0.21        | 3.4E-01        | 9.9E-01  |
| Fungal microbiome richness | Fungal microbiome structure    | 0.32        | 1.5E-01        | 9.9E-01  |
| Fungal microbiome richness | C. albicans DNA conc.          | 0.00        | 9.9E-01        | >9.9E-01 |
| Fungal microbiome richness | Metabolome richness            | -0.05       | 8.2E-01        | 9.9E-01  |
| Fungal microbiome richness | Metabolome structure           | 0.26        | 2.5E-01        | 9.9E-01  |
| Fungal microbiome richness | Cholesterol conv. rate         | 0.22        | 3.3E-01        | 9.9E-01  |
| Fungal microbiome richness | BA transf. capacity            | 0.12        | 6.1E-01        | 9.9E-01  |
| C. albicans DNA conc.      | Bacterial counts               | -0.41       | 6.4E-02        | 9.9E-01  |
| C. albicans DNA conc.      | Bacterial microbiome richness  | -0.09       | 7.0E-01        | 9.9E-01  |
| C. albicans DNA conc.      | Bacterial microbiome structure | -0.18       | 4.3E-01        | 9.9E-01  |
| C. albicans DNA conc.      | Enterobacterales counts        | -0.04       | 8.8E-01        | 9.9E-01  |
| C. albicans DNA conc.      | Global resistome richness      | -0.23       | 3.1E-01        | 9.9E-01  |
| C. albicans DNA conc.      | B-lactamasome abundance        | 0.04        | 8.7E-01        | 9.9E-01  |
| C. albicans DNA conc.      | B-lactamase activity           | -0.11       | 6.5E-01        | 9.9E-01  |
| C. albicans DNA conc.      | Phage microbiome richness      | 0.47        | <b>3.8E-02</b> | 9.9E-01  |
| C. albicans DNA conc.      | Phage microbiome structure     | 0.14        | 5.5E-01        | 9.9E-01  |
| C. albicans DNA conc.      | Fungal load                    | 0.26        | 2.6E-01        | 9.9E-01  |
| C. albicans DNA conc.      | Fungal microbiome richness     | 0.11        | 6.3E-01        | 9.9E-01  |
| C. albicans DNA conc.      | Fungal microbiome structure    | 0.05        | 8.2E-01        | 9.9E-01  |
| C. albicans DNA conc.      | C. albicans DNA conc.          | 0.05        | 8.1E-01        | 9.9E-01  |
| C. albicans DNA conc.      | Metabolome richness            | 0.09        | 7.0E-01        | 9.9E-01  |

| Baseline variable      | Perturbation variable          | Correlation | P-value | Q-value  |
|------------------------|--------------------------------|-------------|---------|----------|
| C. albicans DNA conc.  | Metabolome structure           | -0.15       | 5.2E-01 | 9.9E-01  |
| C. albicans DNA conc.  | Cholesterol conv. rate         | 0.16        | 4.8E-01 | 9.9E-01  |
| C. albicans DNA conc.  | BA transf. capacity            | -0.12       | 6.0E-01 | 9.9E-01  |
| Metabolome richness    | Bacterial counts               | -0.03       | 8.8E-01 | 9.9E-01  |
| Metabolome richness    | Bacterial microbiome richness  | -0.27       | 2.2E-01 | 9.9E-01  |
| Metabolome richness    | Bacterial microbiome structure | 0.18        | 4.1E-01 | 9.9E-01  |
| Metabolome richness    | Enterobacterales counts        | -0.12       | 5.8E-01 | 9.9E-01  |
| Metabolome richness    | Global resistome richness      | -0.09       | 6.9E-01 | 9.9E-01  |
| Metabolome richness    | B-lactamasome abundance        | -0.02       | 9.3E-01 | >9.9E-01 |
| Metabolome richness    | B-lactamase activity           | 0.19        | 4.1E-01 | 9.9E-01  |
| Metabolome richness    | Phage microbiome richness      | 0.16        | 4.9E-01 | 9.9E-01  |
| Metabolome richness    | Phage microbiome structure     | -0.07       | 7.5E-01 | 9.9E-01  |
| Metabolome richness    | Fungal load                    | 0.07        | 7.8E-01 | 9.9E-01  |
| Metabolome richness    | Fungal microbiome richness     | 0.27        | 2.2E-01 | 9.9E-01  |
| Metabolome richness    | Fungal microbiome structure    | 0.10        | 6.7E-01 | 9.9E-01  |
| Metabolome richness    | C. albicans DNA conc.          | 0.11        | 6.4E-01 | 9.9E-01  |
| Metabolome richness    | Metabolome richness            | 0.21        | 3.4E-01 | 9.9E-01  |
| Metabolome richness    | Metabolome structure           | 0.29        | 1.9E-01 | 9.9E-01  |
| Metabolome richness    | Cholesterol conv. rate         | 0.35        | 1.1E-01 | 9.9E-01  |
| Metabolome richness    | BA transf. capacity            | 0.04        | 8.6E-01 | 9.9E-01  |
| Cholesterol conv. rate | Bacterial counts               | -0.20       | 3.6E-01 | 9.9E-01  |
| Cholesterol conv. rate | Bacterial microbiome richness  | -0.17       | 4.4E-01 | 9.9E-01  |
| Cholesterol conv. rate | Bacterial microbiome structure | -0.05       | 8.3E-01 | 9.9E-01  |
| Cholesterol conv. rate | Enterobacterales counts        | -0.03       | 9.0E-01 | 9.9E-01  |
| Cholesterol conv. rate | Global resistome richness      | -0.41       | 5.7E-02 | 9.9E-01  |
| Cholesterol conv. rate | B-lactamasome abundance        | 0.42        | 5.0E-02 | 9.9E-01  |
| Cholesterol conv. rate | B-lactamase activity           | 0.04        | 8.4E-01 | 9.9E-01  |
| Cholesterol conv. rate | Phage microbiome richness      | 0.23        | 3.1E-01 | 9.9E-01  |
| Cholesterol conv. rate | Phage microbiome structure     | -0.29       | 2.0E-01 | 9.9E-01  |
| Cholesterol conv. rate | Fungal load                    | 0.17        | 4.7E-01 | 9.9E-01  |
| Cholesterol conv. rate | Fungal microbiome richness     | 0.09        | 6.9E-01 | 9.9E-01  |
| Cholesterol conv. rate | Fungal microbiome structure    | 0.18        | 4.2E-01 | 9.9E-01  |
| Cholesterol conv. rate | C. albicans DNA conc.          | -0.01       | 9.8E-01 | >9.9E-01 |
| Cholesterol conv. rate | Metabolome richness            | -0.36       | 9.7E-02 | 9.9E-01  |
| Cholesterol conv. rate | Metabolome structure           | 0.15        | 5.0E-01 | 9.9E-01  |
| Cholesterol conv. rate | Cholesterol conv. rate         | 0.29        | 1.9E-01 | 9.9E-01  |
| Cholesterol conv. rate | BA transf. capacity            | -0.01       | 9.7E-01 | >9.9E-01 |
| BA transf. capacity    | Bacterial counts               | -0.08       | 7.2E-01 | 9.9E-01  |
| BA transf. capacity    | Bacterial microbiome richness  | 0.23        | 3.0E-01 | 9.9E-01  |
| BA transf. capacity    | Bacterial microbiome structure | 0.13        | 5.6E-01 | 9.9E-01  |
| BA transf. capacity    | Enterobacterales counts        | -0.16       | 4.8E-01 | 9.9E-01  |
| BA transf. capacity    | Global resistome richness      | -0.04       | 8.8E-01 | 9.9E-01  |
| BA transf. capacity    | B-lactamasome abundance        | -0.01       | 9.6E-01 | >9.9E-01 |
| BA transf. capacity    | B-lactamase activity           | 0.12        | 6.0E-01 | 9.9E-01  |

Supplementary appendix for :  
d'Humières, C. et al. Perturbation and resilience of the gut microbiome up to three months after  $\beta$ -lactams exposure in healthy volunteers suggest an important role of microbial  $\beta$ -lactamases

---

| <b>Baseline variable</b> | <b>Perturbation variable</b> | <b>Correlation</b> | <b>P-value</b> | <b>Q-value</b> |
|--------------------------|------------------------------|--------------------|----------------|----------------|
| BA transf. capacity      | Phage microbiome richness    | 0.14               | 5.3E-01        | 9.9E-01        |
| BA transf. capacity      | Phage microbiome structure   | 0.17               | 4.7E-01        | 9.9E-01        |
| BA transf. capacity      | Fungal load                  | -0.04              | 8.6E-01        | 9.9E-01        |
| BA transf. capacity      | Fungal microbiome richness   | 0.32               | 1.5E-01        | 9.9E-01        |
| BA transf. capacity      | Fungal microbiome structure  | 0.17               | 4.5E-01        | 9.9E-01        |
| BA transf. capacity      | C. albicans DNA conc.        | -0.41              | 7.0E-02        | 9.9E-01        |
| BA transf. capacity      | Metabolome richness          | -0.01              | 9.8E-01        | >9.9E-01       |
| BA transf. capacity      | Metabolome structure         | 0.30               | 1.8E-01        | 9.9E-01        |
| BA transf. capacity      | Cholesterol conv. rate       | 0.12               | 5.8E-01        | 9.9E-01        |
| BA transf. capacity      | BA transf. capacity          | 0.62               | <b>2.7E-03</b> | 5.9E-01        |

**Supplementary Table S6. Spearman’s correlations between the baseline characteristics and the maximal resiliences of the studied gut microbiota and gut components in the 22 healthy volunteers included in the CEREMI trial.**

P-values corresponds to the uncorrected test of the Spearman’s correlation coefficient to 0. Q-value corresponds to the test of the Spearman’s correlation coefficient to 0 after Benjamini & Hochberg’s correction. P-values in bold represent values below 0.05. Conc., concentration; Cholesterol conv. rate, Cholesterol conversion rate; BA transf. Capacity, Bile acids transformation capacity.

| Baseline variable             | Perturbation variable          | Correlation | P-value | Q-value  |
|-------------------------------|--------------------------------|-------------|---------|----------|
| Bacterial counts              | Bacterial counts               | -0.09       | 6.9E-01 | 9.8E-01  |
| Bacterial counts              | Bacterial microbiome richness  | 0.09        | 6.8E-01 | 9.8E-01  |
| Bacterial counts              | Bacterial microbiome structure | 0.04        | 8.8E-01 | 9.8E-01  |
| Bacterial counts              | Enterobacterales counts        | 0.04        | 8.7E-01 | 9.8E-01  |
| Bacterial counts              | Global resistome richness      | -0.08       | 7.1E-01 | 9.8E-01  |
| Bacterial counts              | B-lactamasome abundance        | 0.40        | 6.8E-02 | 8.8E-01  |
| Bacterial counts              | B-lactamase activity           | 0.31        | 1.6E-01 | 9.2E-01  |
| Bacterial counts              | Phage microbiome richness      | 0.36        | 2.1E-01 | 9.2E-01  |
| Bacterial counts              | Phage microbiome structure     | -0.28       | 2.2E-01 | 9.2E-01  |
| Bacterial counts              | Fungal load                    | -0.21       | 3.6E-01 | 9.4E-01  |
| Bacterial counts              | Fungal microbiome richness     | -0.03       | 9.0E-01 | 9.8E-01  |
| Bacterial counts              | Fungal microbiome structure    | -0.07       | 7.5E-01 | 9.8E-01  |
| Bacterial counts              | C. albicans DNA conc.          | 0.00        | 9.9E-01 | >9.9E-01 |
| Bacterial counts              | Metabolome richness            | 0.14        | 5.4E-01 | 9.4E-01  |
| Bacterial counts              | Metabolome structure           | 0.17        | 4.6E-01 | 9.4E-01  |
| Bacterial counts              | Cholesterol conv. rate         | -0.22       | 3.4E-01 | 9.4E-01  |
| Bacterial counts              | BA transf. capacity            | 0.16        | 4.9E-01 | 9.4E-01  |
| Bacterial microbiome richness | Bacterial counts               | -0.37       | 1.0E-01 | 9.2E-01  |
| Bacterial microbiome richness | Bacterial microbiome richness  | -0.12       | 5.8E-01 | 9.5E-01  |
| Bacterial microbiome richness | Bacterial microbiome structure | -0.27       | 2.2E-01 | 9.2E-01  |
| Bacterial microbiome richness | Enterobacterales counts        | 0.03        | 8.8E-01 | 9.8E-01  |
| Bacterial microbiome richness | Global resistome richness      | -0.31       | 1.6E-01 | 9.2E-01  |
| Bacterial microbiome richness | B-lactamasome abundance        | 0.05        | 8.3E-01 | 9.8E-01  |
| Bacterial microbiome richness | B-lactamase activity           | 0.19        | 4.1E-01 | 9.4E-01  |
| Bacterial microbiome richness | Phage microbiome richness      | -0.16       | 5.9E-01 | 9.5E-01  |
| Bacterial microbiome richness | Phage microbiome structure     | -0.29       | 2.1E-01 | 9.2E-01  |
| Bacterial microbiome richness | Fungal load                    | -0.37       | 9.6E-02 | 9.2E-01  |
| Bacterial microbiome richness | Fungal microbiome richness     | -0.18       | 4.3E-01 | 9.4E-01  |
| Bacterial microbiome richness | Fungal microbiome structure    | -0.19       | 4.2E-01 | 9.4E-01  |
| Bacterial microbiome richness | C. albicans DNA conc.          | 0.25        | 2.8E-01 | 9.2E-01  |
| Bacterial microbiome richness | Metabolome richness            | 0.05        | 8.2E-01 | 9.8E-01  |
| Bacterial microbiome richness | Metabolome structure           | 0.43        | 5.3E-02 | 8.8E-01  |
| Bacterial microbiome richness | Cholesterol conv. rate         | 0.16        | 4.8E-01 | 9.4E-01  |
| Bacterial microbiome richness | BA transf. capacity            | -0.13       | 5.9E-01 | 9.5E-01  |
| Enterobacterales counts       | Bacterial counts               | 0.03        | 8.9E-01 | 9.8E-01  |



| Baseline variable         | Perturbation variable          | Correlation | P-value        | Q-value |
|---------------------------|--------------------------------|-------------|----------------|---------|
| Enterobacterales counts   | Bacterial microbiome richness  | 0.22        | 3.2E-01        | 9.2E-01 |
| Enterobacterales counts   | Bacterial microbiome structure | -0.13       | 5.8E-01        | 9.5E-01 |
| Enterobacterales counts   | Enterobacterales counts        | -0.08       | 7.4E-01        | 9.8E-01 |
| Enterobacterales counts   | Global resistome richness      | -0.05       | 8.3E-01        | 9.8E-01 |
| Enterobacterales counts   | B-lactamasome abundance        | 0.14        | 5.3E-01        | 9.4E-01 |
| Enterobacterales counts   | B-lactamase activity           | -0.10       | 6.5E-01        | 9.8E-01 |
| Enterobacterales counts   | Phage microbiome richness      | -0.05       | 8.7E-01        | 9.8E-01 |
| Enterobacterales counts   | Phage microbiome structure     | -0.25       | 2.7E-01        | 9.2E-01 |
| Enterobacterales counts   | Fungal load                    | -0.20       | 3.8E-01        | 9.4E-01 |
| Enterobacterales counts   | Fungal microbiome richness     | 0.47        | <b>3.1E-02</b> | 8.6E-01 |
| Enterobacterales counts   | Fungal microbiome structure    | -0.14       | 5.3E-01        | 9.4E-01 |
| Enterobacterales counts   | C. albicans DNA conc.          | 0.28        | 2.2E-01        | 9.2E-01 |
| Enterobacterales counts   | Metabolome richness            | -0.19       | 4.0E-01        | 9.4E-01 |
| Enterobacterales counts   | Metabolome structure           | -0.23       | 3.2E-01        | 9.2E-01 |
| Enterobacterales counts   | Cholesterol conv. rate         | 0.08        | 7.3E-01        | 9.8E-01 |
| Enterobacterales counts   | BA transf. capacity            | 0.06        | 7.9E-01        | 9.8E-01 |
| Global resistome richness | Bacterial counts               | -0.30       | 1.9E-01        | 9.2E-01 |
| Global resistome richness | Bacterial microbiome richness  | -0.04       | 8.7E-01        | 9.8E-01 |
| Global resistome richness | Bacterial microbiome structure | -0.25       | 2.7E-01        | 9.2E-01 |
| Global resistome richness | Enterobacterales counts        | -0.05       | 8.2E-01        | 9.8E-01 |
| Global resistome richness | Global resistome richness      | -0.23       | 3.1E-01        | 9.2E-01 |
| Global resistome richness | B-lactamasome abundance        | 0.02        | 9.1E-01        | 9.8E-01 |
| Global resistome richness | B-lactamase activity           | 0.16        | 4.7E-01        | 9.4E-01 |
| Global resistome richness | Phage microbiome richness      | -0.29       | 3.1E-01        | 9.2E-01 |
| Global resistome richness | Phage microbiome structure     | -0.29       | 2.0E-01        | 9.2E-01 |
| Global resistome richness | Fungal load                    | -0.27       | 2.4E-01        | 9.2E-01 |
| Global resistome richness | Fungal microbiome richness     | -0.27       | 2.3E-01        | 9.2E-01 |
| Global resistome richness | Fungal microbiome structure    | -0.30       | 1.8E-01        | 9.2E-01 |
| Global resistome richness | C. albicans DNA conc.          | 0.04        | 8.6E-01        | 9.8E-01 |
| Global resistome richness | Metabolome richness            | -0.06       | 7.9E-01        | 9.8E-01 |
| Global resistome richness | Metabolome structure           | 0.50        | <b>2.2E-02</b> | 7.6E-01 |
| Global resistome richness | Cholesterol conv. rate         | 0.25        | 2.7E-01        | 9.2E-01 |
| Global resistome richness | BA transf. capacity            | -0.02       | 9.2E-01        | 9.8E-01 |
| B-lactamasome abundance   | Bacterial counts               | -0.04       | 8.8E-01        | 9.8E-01 |
| B-lactamasome abundance   | Bacterial microbiome richness  | 0.11        | 6.1E-01        | 9.6E-01 |
| B-lactamasome abundance   | Bacterial microbiome structure | 0.10        | 6.5E-01        | 9.8E-01 |
| B-lactamasome abundance   | Enterobacterales counts        | -0.07       | 7.7E-01        | 9.8E-01 |
| B-lactamasome abundance   | Global resistome richness      | 0.21        | 3.5E-01        | 9.4E-01 |
| B-lactamasome abundance   | B-lactamasome abundance        | 0.06        | 8.1E-01        | 9.8E-01 |
| B-lactamasome abundance   | B-lactamase activity           | -0.08       | 7.1E-01        | 9.8E-01 |
| B-lactamasome abundance   | Phage microbiome richness      | 0.30        | 3.0E-01        | 9.2E-01 |
| B-lactamasome abundance   | Phage microbiome structure     | -0.01       | 9.6E-01        | 9.8E-01 |
| B-lactamasome abundance   | Fungal load                    | 0.17        | 4.7E-01        | 9.4E-01 |
| B-lactamasome abundance   | Fungal microbiome richness     | 0.23        | 3.2E-01        | 9.2E-01 |

| Baseline variable         | Perturbation variable          | Correlation | P-value        | Q-value |
|---------------------------|--------------------------------|-------------|----------------|---------|
| B-lactamasome abundance   | Fungal microbiome structure    | -0.15       | 5.1E-01        | 9.4E-01 |
| B-lactamasome abundance   | C. albicans DNA conc.          | -0.21       | 3.5E-01        | 9.4E-01 |
| B-lactamasome abundance   | Metabolome richness            | -0.30       | 1.9E-01        | 9.2E-01 |
| B-lactamasome abundance   | Metabolome structure           | -0.54       | <b>1.3E-02</b> | 7.6E-01 |
| B-lactamasome abundance   | Cholesterol conv. rate         | -0.30       | 1.9E-01        | 9.2E-01 |
| B-lactamasome abundance   | BA transf. capacity            | 0.13        | 5.7E-01        | 9.5E-01 |
| B-lactamase activity      | Bacterial counts               | -0.13       | 5.8E-01        | 9.5E-01 |
| B-lactamase activity      | Bacterial microbiome richness  | -0.01       | 9.6E-01        | 9.8E-01 |
| B-lactamase activity      | Bacterial microbiome structure | -0.48       | <b>2.4E-02</b> | 7.6E-01 |
| B-lactamase activity      | Enterobacterales counts        | 0.19        | 3.9E-01        | 9.4E-01 |
| B-lactamase activity      | Global resistome richness      | -0.01       | 9.7E-01        | 9.9E-01 |
| B-lactamase activity      | B-lactamasome abundance        | 0.04        | 8.5E-01        | 9.8E-01 |
| B-lactamase activity      | B-lactamase activity           | 0.29        | 1.9E-01        | 9.2E-01 |
| B-lactamase activity      | Phage microbiome richness      | -0.20       | 5.0E-01        | 9.4E-01 |
| B-lactamase activity      | Phage microbiome structure     | -0.15       | 5.2E-01        | 9.4E-01 |
| B-lactamase activity      | Fungal load                    | -0.07       | 7.6E-01        | 9.8E-01 |
| B-lactamase activity      | Fungal microbiome richness     | -0.29       | 2.1E-01        | 9.2E-01 |
| B-lactamase activity      | Fungal microbiome structure    | -0.25       | 2.8E-01        | 9.2E-01 |
| B-lactamase activity      | C. albicans DNA conc.          | -0.13       | 5.8E-01        | 9.5E-01 |
| B-lactamase activity      | Metabolome richness            | 0.04        | 8.6E-01        | 9.8E-01 |
| B-lactamase activity      | Metabolome structure           | 0.22        | 3.5E-01        | 9.4E-01 |
| B-lactamase activity      | Cholesterol conv. rate         | 0.18        | 4.3E-01        | 9.4E-01 |
| B-lactamase activity      | BA transf. capacity            | 0.05        | 8.3E-01        | 9.8E-01 |
| Phage microbiome richness | Bacterial counts               | -0.07       | 7.7E-01        | 9.8E-01 |
| Phage microbiome richness | Bacterial microbiome richness  | -0.20       | 3.8E-01        | 9.4E-01 |
| Phage microbiome richness | Bacterial microbiome structure | -0.08       | 7.2E-01        | 9.8E-01 |
| Phage microbiome richness | Enterobacterales counts        | 0.15        | 5.3E-01        | 9.4E-01 |
| Phage microbiome richness | Global resistome richness      | -0.04       | 8.5E-01        | 9.8E-01 |
| Phage microbiome richness | B-lactamasome abundance        | -0.14       | 5.4E-01        | 9.4E-01 |
| Phage microbiome richness | B-lactamase activity           | 0.09        | 7.1E-01        | 9.8E-01 |
| Phage microbiome richness | Phage microbiome richness      | -0.23       | 4.4E-01        | 9.4E-01 |
| Phage microbiome richness | Phage microbiome structure     | 0.28        | 2.2E-01        | 9.2E-01 |
| Phage microbiome richness | Fungal load                    | 0.02        | 9.3E-01        | 9.8E-01 |
| Phage microbiome richness | Fungal microbiome richness     | -0.29       | 2.2E-01        | 9.2E-01 |
| Phage microbiome richness | Fungal microbiome structure    | -0.27       | 2.4E-01        | 9.2E-01 |
| Phage microbiome richness | C. albicans DNA conc.          | 0.17        | 4.7E-01        | 9.4E-01 |
| Phage microbiome richness | Metabolome richness            | 0.24        | 3.1E-01        | 9.2E-01 |
| Phage microbiome richness | Metabolome structure           | 0.37        | 1.0E-01        | 9.2E-01 |
| Phage microbiome richness | Cholesterol conv. rate         | 0.25        | 2.8E-01        | 9.2E-01 |
| Phage microbiome richness | BA transf. capacity            | 0.06        | 7.9E-01        | 9.8E-01 |
| Fungal load               | Bacterial counts               | 0.25        | 2.9E-01        | 9.2E-01 |
| Fungal load               | Bacterial microbiome richness  | -0.02       | 9.5E-01        | 9.8E-01 |
| Fungal load               | Bacterial microbiome structure | 0.16        | 4.8E-01        | 9.4E-01 |
| Fungal load               | Enterobacterales counts        | 0.32        | 1.6E-01        | 9.2E-01 |

| Baseline variable          | Perturbation variable          | Correlation | P-value        | Q-value |
|----------------------------|--------------------------------|-------------|----------------|---------|
| Fungal load                | Global resistome richness      | 0.25        | 2.8E-01        | 9.2E-01 |
| Fungal load                | B-lactamasome abundance        | 0.42        | 6.0E-02        | 8.8E-01 |
| Fungal load                | B-lactamase activity           | -0.35       | 1.2E-01        | 9.2E-01 |
| Fungal load                | Phage microbiome richness      | -0.53       | 5.7E-02        | 8.8E-01 |
| Fungal load                | Phage microbiome structure     | 0.16        | 5.0E-01        | 9.4E-01 |
| Fungal load                | Fungal load                    | -0.55       | <b>1.0E-02</b> | 7.6E-01 |
| Fungal load                | Fungal microbiome richness     | -0.02       | 9.3E-01        | 9.8E-01 |
| Fungal load                | Fungal microbiome structure    | 0.01        | 9.5E-01        | 9.8E-01 |
| Fungal load                | C. albicans DNA conc.          | 0.42        | 5.5E-02        | 8.8E-01 |
| Fungal load                | Metabolome richness            | 0.02        | 9.4E-01        | 9.8E-01 |
| Fungal load                | Metabolome structure           | 0.02        | 9.4E-01        | 9.8E-01 |
| Fungal load                | Cholesterol conv. rate         | 0.21        | 3.7E-01        | 9.4E-01 |
| Fungal load                | BA transf. capacity            | 0.05        | 8.1E-01        | 9.8E-01 |
| Fungal microbiome richness | Bacterial counts               | -0.03       | 8.9E-01        | 9.8E-01 |
| Fungal microbiome richness | Bacterial microbiome richness  | 0.18        | 4.1E-01        | 9.4E-01 |
| Fungal microbiome richness | Bacterial microbiome structure | 0.01        | 9.6E-01        | 9.8E-01 |
| Fungal microbiome richness | Enterobacterales counts        | -0.11       | 6.2E-01        | 9.8E-01 |
| Fungal microbiome richness | Global resistome richness      | 0.14        | 5.2E-01        | 9.4E-01 |
| Fungal microbiome richness | B-lactamasome abundance        | -0.06       | 7.9E-01        | 9.8E-01 |
| Fungal microbiome richness | B-lactamase activity           | 0.03        | 8.8E-01        | 9.8E-01 |
| Fungal microbiome richness | Phage microbiome richness      | 0.03        | 9.1E-01        | 9.8E-01 |
| Fungal microbiome richness | Phage microbiome structure     | -0.11       | 6.3E-01        | 9.8E-01 |
| Fungal microbiome richness | Fungal load                    | 0.08        | 7.3E-01        | 9.8E-01 |
| Fungal microbiome richness | Fungal microbiome richness     | -0.21       | 3.7E-01        | 9.4E-01 |
| Fungal microbiome richness | Fungal microbiome structure    | 0.13        | 5.9E-01        | 9.5E-01 |
| Fungal microbiome richness | C. albicans DNA conc.          | -0.45       | <b>4.1E-02</b> | 8.8E-01 |
| Fungal microbiome richness | Metabolome richness            | -0.24       | 3.0E-01        | 9.2E-01 |
| Fungal microbiome richness | Metabolome structure           | 0.11        | 6.4E-01        | 9.8E-01 |
| Fungal microbiome richness | Cholesterol conv. rate         | 0.16        | 4.8E-01        | 9.4E-01 |
| Fungal microbiome richness | BA transf. capacity            | -0.21       | 3.7E-01        | 9.4E-01 |
| C. albicans DNA conc.      | Bacterial counts               | -0.10       | 6.7E-01        | 9.8E-01 |
| C. albicans DNA conc.      | Bacterial microbiome richness  | -0.07       | 7.5E-01        | 9.8E-01 |
| C. albicans DNA conc.      | Bacterial microbiome structure | 0.03        | 8.8E-01        | 9.8E-01 |
| C. albicans DNA conc.      | Enterobacterales counts        | -0.16       | 5.0E-01        | 9.4E-01 |
| C. albicans DNA conc.      | Global resistome richness      | -0.31       | 1.7E-01        | 9.2E-01 |
| C. albicans DNA conc.      | B-lactamasome abundance        | 0.11        | 6.4E-01        | 9.8E-01 |
| C. albicans DNA conc.      | B-lactamase activity           | 0.16        | 4.7E-01        | 9.4E-01 |
| C. albicans DNA conc.      | Phage microbiome richness      | -0.04       | 8.9E-01        | 9.8E-01 |
| C. albicans DNA conc.      | Phage microbiome structure     | 0.02        | 9.4E-01        | 9.8E-01 |
| C. albicans DNA conc.      | Fungal load                    | -0.06       | 8.0E-01        | 9.8E-01 |
| C. albicans DNA conc.      | Fungal microbiome richness     | 0.11        | 6.4E-01        | 9.8E-01 |
| C. albicans DNA conc.      | Fungal microbiome structure    | 0.17        | 4.5E-01        | 9.4E-01 |
| C. albicans DNA conc.      | C. albicans DNA conc.          | 0.46        | <b>3.5E-02</b> | 8.6E-01 |
| C. albicans DNA conc.      | Metabolome richness            | 0.12        | 5.9E-01        | 9.5E-01 |

| Baseline variable      | Perturbation variable          | Correlation | P-value        | Q-value  |
|------------------------|--------------------------------|-------------|----------------|----------|
| C. albicans DNA conc.  | Metabolome structure           | 0.43        | 5.2E-02        | 8.8E-01  |
| C. albicans DNA conc.  | Cholesterol conv. rate         | -0.15       | 5.2E-01        | 9.4E-01  |
| C. albicans DNA conc.  | BA transf. capacity            | -0.03       | 9.1E-01        | 9.8E-01  |
| Metabolome richness    | Bacterial counts               | 0.00        | >9.9E-01       | >9.9E-01 |
| Metabolome richness    | Bacterial microbiome richness  | -0.13       | 5.6E-01        | 9.5E-01  |
| Metabolome richness    | Bacterial microbiome structure | 0.09        | 7.0E-01        | 9.8E-01  |
| Metabolome richness    | Enterobacterales counts        | -0.22       | 3.2E-01        | 9.2E-01  |
| Metabolome richness    | Global resistome richness      | 0.14        | 5.2E-01        | 9.4E-01  |
| Metabolome richness    | B-lactamasome abundance        | -0.08       | 7.2E-01        | 9.8E-01  |
| Metabolome richness    | B-lactamase activity           | 0.23        | 3.0E-01        | 9.2E-01  |
| Metabolome richness    | Phage microbiome richness      | 0.31        | 2.8E-01        | 9.2E-01  |
| Metabolome richness    | Phage microbiome structure     | -0.14       | 5.4E-01        | 9.4E-01  |
| Metabolome richness    | Fungal load                    | -0.05       | 8.2E-01        | 9.8E-01  |
| Metabolome richness    | Fungal microbiome richness     | -0.28       | 2.1E-01        | 9.2E-01  |
| Metabolome richness    | Fungal microbiome structure    | 0.00        | 9.9E-01        | >9.9E-01 |
| Metabolome richness    | C. albicans DNA conc.          | -0.40       | 7.6E-02        | 9.2E-01  |
| Metabolome richness    | Metabolome richness            | -0.06       | 7.8E-01        | 9.8E-01  |
| Metabolome richness    | Metabolome structure           | 0.29        | 2.0E-01        | 9.2E-01  |
| Metabolome richness    | Cholesterol conv. rate         | -0.16       | 4.9E-01        | 9.4E-01  |
| Metabolome richness    | BA transf. capacity            | 0.01        | 9.5E-01        | 9.8E-01  |
| Cholesterol conv. rate | Bacterial counts               | -0.25       | 2.7E-01        | 9.2E-01  |
| Cholesterol conv. rate | Bacterial microbiome richness  | 0.30        | 1.7E-01        | 9.2E-01  |
| Cholesterol conv. rate | Bacterial microbiome structure | -0.02       | 9.4E-01        | 9.8E-01  |
| Cholesterol conv. rate | Enterobacterales counts        | -0.08       | 7.3E-01        | 9.8E-01  |
| Cholesterol conv. rate | Global resistome richness      | -0.22       | 3.2E-01        | 9.2E-01  |
| Cholesterol conv. rate | B-lactamasome abundance        | 0.21        | 3.4E-01        | 9.4E-01  |
| Cholesterol conv. rate | B-lactamase activity           | 0.49        | <b>2.0E-02</b> | 7.6E-01  |
| Cholesterol conv. rate | Phage microbiome richness      | 0.43        | 1.3E-01        | 9.2E-01  |
| Cholesterol conv. rate | Phage microbiome structure     | -0.27       | 2.4E-01        | 9.2E-01  |
| Cholesterol conv. rate | Fungal load                    | -0.08       | 7.2E-01        | 9.8E-01  |
| Cholesterol conv. rate | Fungal microbiome richness     | -0.41       | 6.4E-02        | 8.8E-01  |
| Cholesterol conv. rate | Fungal microbiome structure    | 0.04        | 8.5E-01        | 9.8E-01  |
| Cholesterol conv. rate | C. albicans DNA conc.          | -0.09       | 7.0E-01        | 9.8E-01  |
| Cholesterol conv. rate | Metabolome richness            | -0.04       | 8.5E-01        | 9.8E-01  |
| Cholesterol conv. rate | Metabolome structure           | 0.30        | 1.9E-01        | 9.2E-01  |
| Cholesterol conv. rate | Cholesterol conv. rate         | -0.16       | 4.7E-01        | 9.4E-01  |
| Cholesterol conv. rate | BA transf. capacity            | -0.19       | 4.1E-01        | 9.4E-01  |
| BA transf. capacity    | Bacterial counts               | -0.28       | 2.2E-01        | 9.2E-01  |
| BA transf. capacity    | Bacterial microbiome richness  | 0.18        | 4.1E-01        | 9.4E-01  |
| BA transf. capacity    | Bacterial microbiome structure | -0.16       | 4.9E-01        | 9.4E-01  |
| BA transf. capacity    | Enterobacterales counts        | -0.27       | 2.2E-01        | 9.2E-01  |
| BA transf. capacity    | Global resistome richness      | -0.09       | 6.9E-01        | 9.8E-01  |
| BA transf. capacity    | B-lactamasome abundance        | -0.23       | 3.0E-01        | 9.2E-01  |
| BA transf. capacity    | B-lactamase activity           | 0.37        | 8.6E-02        | 9.2E-01  |

Supplementary appendix for :  
d'Humières, C. et al. Perturbation and resilience of the gut microbiome up to three months after  $\beta$ -lactams exposure in healthy volunteers suggest an important role of microbial  $\beta$ -lactamases

---

| <b>Baseline variable</b> | <b>Perturbation variable</b> | <b>Correlation</b> | <b>P-value</b> | <b>Q-value</b> |
|--------------------------|------------------------------|--------------------|----------------|----------------|
| BA transf. capacity      | Phage microbiome richness    | -0.08              | 8.0E-01        | 9.8E-01        |
| BA transf. capacity      | Phage microbiome structure   | -0.52              | <b>1.7E-02</b> | 7.6E-01        |
| BA transf. capacity      | Fungal load                  | 0.33               | 1.4E-01        | 9.2E-01        |
| BA transf. capacity      | Fungal microbiome richness   | -0.15              | 5.3E-01        | 9.4E-01        |
| BA transf. capacity      | Fungal microbiome structure  | 0.13               | 5.8E-01        | 9.5E-01        |
| BA transf. capacity      | C. albicans DNA conc.        | -0.60              | <b>4.0E-03</b> | 7.6E-01        |
| BA transf. capacity      | Metabolome richness          | -0.16              | 4.7E-01        | 9.4E-01        |
| BA transf. capacity      | Metabolome structure         | 0.25               | 2.6E-01        | 9.2E-01        |
| BA transf. capacity      | Cholesterol conv. rate       | 0.23               | 3.1E-01        | 9.2E-01        |
| BA transf. capacity      | BA transf. capacity          | -0.12              | 6.0E-01        | 9.6E-01        |

**Supplementary Table S7. Baseline characteristics, maximal perturbations and maximal resiliences of the studied gut microbiota and gut components in the 22 healthy volunteers included in the CEREMI trial**

Variables are colored according to their level relative to the median value, colored in white. For the baseline state of the microbiota, the green color is indicative of the high richness of the microbiota, while red indicates poor richness. For systems' perturbation and resilience, green color indicates low perturbation and high resilience, and red color indicates high perturbation and low resilience. Subjects 3 and 16 had detectable levels of antibiotics in faeces; together with subjects 22 and 28 they had no  $\beta$ -lactamase activity at baseline. Conc., concentration ; Cholesterol conv. rate, Cholesterol conversion rate ; BA transf. Capacity, Bile acids transformation capacity.

|                                              | Subject ID |      |       |       |       |       |       |       |       |       |       |       |       |       |       |       |       |       |       |       |       |       |  |
|----------------------------------------------|------------|------|-------|-------|-------|-------|-------|-------|-------|-------|-------|-------|-------|-------|-------|-------|-------|-------|-------|-------|-------|-------|--|
|                                              | 1          | 2    | 3     | 6     | 8     | 9     | 11    | 12    | 13    | 14    | 16    | 17    | 18    | 20    | 22    | 23    | 24    | 25    | 27    | 28    | 29    | 34    |  |
| <b>Baseline raw values</b>                   |            |      |       |       |       |       |       |       |       |       |       |       |       |       |       |       |       |       |       |       |       |       |  |
| Bacterial counts (log10 CFU/g)               | 11.0       | 11.6 | 11.0  | 11.1  | 11.3  | 11.5  | 11.4  | 11.0  | 11.4  | 11.3  | 11.3  | 11.4  | 11.3  | 10.5  | 11.5  | 11.3  | 11.4  | 11.5  | 11.5  | 11.2  | 11.4  |       |  |
| Bacterial microbiome richness (MGS/g)        | 174        | 279  | 124   | 219   | 377   | 276   | 305   | 346   | 346   | 232   | 251   | 314   | 193   | 289   | 155   | 295   | 295   | 262   | 288   | 288   | 304   |       |  |
| Enterobacteriales counts (log10 CFU/g)       | 8.2        | 6.9  | 8.3   | 8.6   | 7.3   | 9.0   | 8.3   | 7.6   | 8.0   | 0.0   | 5.0   | 10.7  | 8.4   | 6.9   | 7.1   | 6.5   | 7.2   | 8.2   | 8.4   | 8.7   | 6.3   | 9.0   |  |
| Global resistome richness (copies/g)         | 555        | 866  | 376   | 711   | 935   | 845   | 913   | 964   | 798   | 601   | 746   | 1008  | 712   | 902   | 538   | 989   | 929   | 888   | 913   | 1042  | 883   | 946   |  |
| B-lactamase abundance (log10)                | 0.18       | 0.14 | 0.15  | 0.14  | 0.12  | 0.15  | 0.12  | 0.13  | 0.13  | 0.14  | 0.16  | 0.15  | 0.15  | 0.14  | 0.15  | 0.14  | 0.14  | 0.14  | 0.14  | 0.15  | 0.14  | 0.14  |  |
| B-lactamase activity (log10 nmol/min.g)      | 1.4        | 1.7  | 0.0   | 1.1   | 1.8   | 0.9   | 1.2   | 0.7   | 0.9   | 1.6   | 0.0   | 1.0   | 1.3   | 2.0   | 0.0   | 2.6   | 1.6   | 1.2   | 1.1   | 0.0   | 1.1   | 1.5   |  |
| Phage microbiome richness (contigs/g)        | 988        | 1510 | 567   | 1296  | 1587  | 917   | 1472  | 1101  | 1329  | 1401  | 926   | 1474  | 744   | 1118  | 1370  | 1088  | 1219  | 1345  | 1484  | 1448  | NA    | 1445  |  |
| Fungal load (log10)                          | 4E-09      | NA   | 1E-07 | 2E-03 | 2E-04 | 1E-04 | 9E-07 | 8E-06 | 2E-05 | 3E-07 | 8E-06 | 1E-05 | 6E-10 | 7E-08 | 2E-05 | 6E-05 | 2E-06 | 7E-06 | 7E-06 | 6E-08 | 2E-06 | 1E-04 |  |
| Fungal microbiome richness (fungal OTUs/g)   | 13         | 13   | 13    | 50    | 11    | 27    | 16    | 5     | 13    | 47    | 23    | 24    | 27    | 18    | 18    | 24    | 25    | 26    | 29    | 35    | 31    | 27    |  |
| C. albicans DNA concentration (log10)        | -5.3       | NA   | -5.8  | -5.7  | -3.1  | -4.3  | -4.5  | -4.2  | -3.1  | -5.3  | -5.8  | -5.3  | -5.3  | -4.5  | -4.7  | -6.1  | -4.5  | -6.2  | -4.4  | -5.4  | -5.3  | -5.6  |  |
| Metabolome richness (chemical species/g)     | 1460       | 1498 | 1362  | 1476  | 1432  | 1527  | 1403  | 1456  | 1446  | 1553  | 1572  | 854   | 1453  | 1537  | 1458  | 1522  | 1534  | 1491  | 1484  | 1536  | 1489  | 1483  |  |
| Cholesterol conversion rate (log10)          | 0.0        | 0.9  | 0.0   | 0.1   | 0.9   | 0.9   | 0.6   | 0.8   | 0.8   | 0.9   | 0.8   | 0.7   | 0.9   | 0.9   | 0.0   | 0.9   | 0.8   | 0.5   | 0.8   | 1.0   | 0.9   | 0.7   |  |
| Bile acids transformation capacity (log10)   | 0.9        | 0.8  | 0.6   | 0.8   | 0.6   | 0.8   | 0.9   | 0.8   | 0.8   | 0.9   | 0.6   | 0.8   | 1.0   | 0.7   | 0.3   | 0.9   | 1.0   | 0.9   | 1.0   | 1.0   | 1.0   | 0.9   |  |
| <b>Perturbation : distance from baseline</b> |            |      |       |       |       |       |       |       |       |       |       |       |       |       |       |       |       |       |       |       |       |       |  |
| Bacterial counts                             | 1.5        | 4.5  | 13.1  | 3.6   | 0.5   | 5.4   | 28.9  | 16.0  | 2.4   | 2.1   | 36.0  | 1.0   | 2.5   | 0.5   | 0.9   | 3.6   | 0.6   | 51.8  | 2.0   | 0.9   | 2.4   | 3.9   |  |
| Bacterial microbiome richness                | 39.0       | 7.8  | 4.4   | 13.0  | 3.8   | 10.4  | 18.0  | 60.7  | 4.6   | 4.0   | 25.6  | 10.9  | 54.0  | 1.8   | 3.5   | 4.5   | 3.8   | 5.7   | 7.8   | 4.0   | 11.3  | 10.2  |  |
| Bacterial microbiome structure               | 2.3        | 3.2  | 3.6   | 1.5   | 2.4   | 3.1   | 3.1   | 4.7   | 2.5   | 4.4   | 7.0   | 3.2   | 1.9   | 1.9   | 3.5   | 3.7   | 3.0   | 3.5   | 7.7   | 2.7   | 5.2   | 3.5   |  |
| Enterobacteriales counts                     | 3.4        | 2.0  | 12.9  | 3.2   | 5.3   | 14.2  | 2.9   | 1.9   | 15.3  | 1.2   | 4.6   | 2.4   | 8.9   | 1.8   | 35.0  | 14.6  | 10.8  | 10.4  | 4.3   | 8.1   | 1.4   | 3.0   |  |
| Global resistome richness                    | 17.2       | 10.4 | 8.5   | 77.0  | 2.2   | 9.0   | 30.0  | 13.5  | 2.2   | 1.5   | 194.9 | 6.5   | 7.4   | 2.9   | 9.7   | 3.8   | 5.3   | 4.1   | 6.6   | 8.2   | 11.6  | 17.1  |  |
| B-lactamase abundance                        | 1.1        | 3.6  | 1.2   | 5.0   | 7.1   | 23.6  | 6.7   | 4.8   | 16.3  | 5.5   | 14.2  | 9.6   | 30.6  | 5.1   | 3.5   | 14.5  | 1.7   | 5.4   | 3.7   | 2.7   | 9.1   | 10.7  |  |
| B-lactamase activity                         | 2.7        | 5.5  | 3.4   | 3.6   | 1.4   | 17.3  | 2.2   | 9.4   | 2.0   | 21.3  | 0.0   | 1.0   | 4.9   | 2.2   | 7.2   | 3.1   | 0.9   | 16.7  | 5.7   | 4.9   | 2.2   | 3.0   |  |
| Phage microbiome richness                    | 12.4       | 3.2  | 1.9   | 2.8   | 3.0   | 6.9   | 2.2   | 3.0   | 2.0   | 0.1   | 0.9   | 2.8   | 2.4   | 24.7  | 2.8   | 2.0   | 3.7   | 0.9   | 3.2   | 78.3  | NA    | 0.4   |  |
| Phage microbiome structure                   | 2.3        | 1.2  | 1.0   | 1.4   | 1.9   | 1.2   | 1.2   | 2.5   | 1.0   | 1.9   | 1.7   | 2.1   | 1.5   | 1.4   | 1.8   | 1.3   | 1.5   | 1.9   | 2.6   | 1.1   | NA    | 1.5   |  |
| Fungal load                                  | 1.6        | NA   | 1.3   | 0.5   | 2.5   | 0.8   | 0.4   | 0.6   | 5.4   | 1.1   | 1.7   | 1.3   | 2.4   | 3.0   | 4.4   | 1.8   | 2.6   | 1.5   | 5.2   | 1.0   | 1.6   | 1.6   |  |
| Fungal microbiome richness                   | 6.5        | 1.5  | 1.6   | 1.6   | 0.7   | 6.7   | 0.7   | 3.0   | 3.0   | 4.1   | 1.1   | 0.9   | 4.0   | 2.1   | 2.2   | 3.0   | 3.1   | 0.9   | 2.0   | 2.6   | 1.5   | 6.0   |  |
| Fungal microbiome structure                  | 1.0        | 1.0  | 1.1   | 1.1   | 0.9   | 1.1   | 1.0   | 1.3   | 1.2   | 1.2   | 1.1   | 1.1   | 1.1   | 1.1   | 1.1   | 1.1   | 1.0   | 0.9   | 1.2   | 1.1   | 1.2   | 1.0   |  |
| C. albicans DNA concentration                | 2.4        | NA   | 9.6   | 2.1   | 2.4   | 3.3   | 1.4   | 1.5   | 8.3   | 44.7  | 2.5   | 2.2   | 2.5   | 23.0  | 3.4   | 1.4   | 2.1   | 1.6   | 2.0   | 1.8   | 2.4   | 3.9   |  |
| Metabolome richness                          | 3.2        | 1.1  | 1.1   | 2.5   | 1.6   | 2.2   | 2.6   | 2.4   | 4.4   | 0.9   | 7.5   | 1.0   | 1.6   | 2.7   | 6.2   | 1.7   | 5.6   | 3.2   | 3.1   | 2.3   | 2.6   | 2.2   |  |
| Metabolome structure                         | 1.1        | 0.9  | 1.4   | 1.3   | 1.2   | 1.3   | 1.3   | 1.7   | 1.3   | 1.6   | 1.7   | 1.5   | 1.3   | 1.4   | 1.1   | 2.1   | 1.8   | 1.3   | 2.1   | 1.3   | 1.3   | 1.5   |  |
| Cholesterol conversion rate                  | 1.5        | 0.5  | 1.2   | 3.6   | 15.2  | 10.3  | 4.9   | 18.8  | 8.0   | 83.3  | 12.6  | 43.6  | 2.8   | 53.4  | 9.2   | 324.8 | 13.1  | 6.1   | 45.1  | 9.4   | 10.4  | 25.0  |  |
| Bile acids transformation capacity           | 40.1       | 2.3  | 5.2   | 0.4   | 1.2   | 2.4   | 4.1   | 35.3  | 11.5  | 13.9  | 15.6  | 16.1  | 10.9  | 2.6   | 1.6   | 24.6  | 9.1   | 10.7  | 79.3  | 9.8   | 59.7  | 31.1  |  |
| <b>Resilience : distance from baseline</b>   |            |      |       |       |       |       |       |       |       |       |       |       |       |       |       |       |       |       |       |       |       |       |  |
| Bacterial counts                             | 0.8        | 3.7  | 1.9   | 1.7   | NA    | 2.7   | 0.2   | 9.1   | 0.4   | 1.3   | 0.8   | 0.6   | 0.6   | 1.0   | 1.4   | 0.3   | 0.4   | 21.8  | 1.2   | 0.3   | 1.5   | 1.6   |  |
| Bacterial microbiome richness                | 0.5        | 5.4  | 1.6   | 3.0   | 0.3   | 3.4   | 0.2   | 7.3   | 0.4   | 1.0   | 0.1   | 1.6   | 8.0   | 0.7   | 0.1   | 0.9   | 0.0   | 0.2   | 0.8   | 0.6   | 3.5   | 0.9   |  |
| Bacterial microbiome structure               | 0.9        | 2.1  | 1.6   | 1.0   | 1.3   | 2.5   | 1.0   | 1.4   | 1.3   | 1.2   | 4.6   | 1.4   | 1.3   | 0.9   | 2.4   | 0.9   | 1.4   | 1.7   | 1.6   | 1.0   | 2.5   | 1.0   |  |
| Enterobacteriales counts                     | 0.5        | 0.5  | 0.1   | 0.7   | 1.0   | 0.0   | 0.6   | 0.2   | 6.0   | 0.7   | 0.7   | 0.9   | 1.6   | 0.4   | 2.8   | 2.1   | 0.6   | 2.6   | 0.0   | 0.3   | 0.0   | 0.7   |  |
| Global resistome richness                    | 1.7        | 7.3  | 1.4   | 33.5  | 0.4   | 1.4   | 1.2   | 0.5   | 0.1   | 1.3   | 9.1   | 1.0   | 0.1   | 0.3   | 0.2   | 0.8   | 0.3   | 0.3   | 1.0   | 0.1   | 3.9   | 1.7   |  |
| B-lactamase abundance                        | 0.3        | 0.2  | 0.1   | 0.2   | 1.6   | 6.9   | 0.6   | 0.2   | 1.7   | 0.3   | 1.7   | 0.8   | 6.4   | 0.5   | 1.2   | 1.8   | 0.1   | 0.6   | 0.7   | 0.1   | 0.0   | 1.5   |  |
| B-lactamase activity                         | 2.1        | 2.7  | 0.0   | 0.0   | 0.9   | 1.7   | 0.2   | 3.9   | 0.6   | 9.0   | 0.0   | 0.4   | 2.1   | 0.8   | 0.0   | 0.6   | 0.2   | 1.9   | 0.2   | 2.3   | 1.2   | 0.3   |  |
| Phage microbiome richness                    | NA         | NA   | 2.7   | 0.3   | NA    | 2.3   | 0.8   | 0.1   | 2.1   | NA    | NA    | 0.1   | 1.3   | 13.7  | NA    | 0.7   | 0.5   | NA    | 0.7   | 14.8  | NA    | 0.6   |  |
| Phage microbiome structure                   | 0.9        | 1.2  | 1.1   | 1.2   | 1.7   | 1.0   | 1.0   | 1.1   | 0.9   | 1.2   | 1.4   | 1.3   | 1.1   | 1.0   | 2.0   | 0.7   | 1.0   | 1.3   | 1.2   | 0.7   | NA    | 0.8   |  |
| Fungal load                                  | 1.0        | NA   | 0.8   | 0.0   | 0.3   | 0.2   | 0.9   | 0.9   | 0.1   | 1.2   | 0.4   | 0.3   | 1.3   | 0.6   | 3.5   | 0.5   | 0.2   | 0.6   | 1.2   | 0.7   | 1.4   | 0.7   |  |
| Fungal microbiome richness                   | 2.0        | NA   | 0.5   | 0.5   | 0.2   | 1.0   | 1.1   | 1.1   | 0.5   | 0.3   | 0.5   | 0.3   | 0.6   | 0.3   | 0.4   | 0.2   | 0.2   | 0.3   | 0.4   | 0.3   | 0.1   | 4.7   |  |
| Fungal microbiome structure                  | 0.9        | NA   | 0.9   | 1.0   | 0.7   | 0.9   | 0.9   | 1.0   | 1.1   | 1.0   | 0.9   | 0.8   | 0.9   | 0.8   | 0.9   | 1.0   | 0.8   | 0.7   | 1.1   | 0.8   | 1.0   | 0.7   |  |
| C. albicans DNA concentration                | 0.3        | NA   | 1.3   | 0.6   | 1.9   | 1.9   | 0.6   | 0.4   | 4.9   | 0.0   | 0.2   | 0.9   | 0.0   | 3.0   | 0.8   | 0.4   | 0.1   | 0.0   | 1.0   | 0.3   | 0.0   | 0.4   |  |
| Metabolome richness                          | 0.8        | NA   | 0.3   | 0.2   | 0.4   | 0.5   | 1.7   | 0.1   | 1.7   | 0.2   | 0.4   | 0.7   | 0.1   | 1.9   | 1.7   | 1.4   | 0.0   | 1.5   | 1.4   | 0.4   | 1.1   | 0.2   |  |
| Metabolome structure                         | 0.8        | NA   | 0.8   | 0.8   | 1.0   | 1.1   | 1.2   | 1.1   | 0.8   | 1.0   | 0.9   | 0.9   | 0.8   | 1.1   | 0.8   | 1.0   | 1.2   | 0.9   | 1.3   | 1.0   | 1.2   | 0.8   |  |
| Cholesterol conversion rate                  | 0.2        | NA   | 0.8   | 1.1   | 0.2   | 0.0   | 0.1   | 0.2   | 0.3   | 0.2   | 0.1   | 1.7   | 0.0   | 0.3   | 0.1   | 0.4   | 0.8   | 0.2   | 0.9   | 0.1   | 2.5   | 0.7   |  |
| Bile acids transformation capacity           | 0.8        | NA   | 0.8   | 0.1   | 0.6   | 0.8   | 2.5   | 0.2   | 0.1   | 0.2   | 0.8   | 0.1   | 0.1   | 0.3   | 1.2   | 0.9   | 0.2   | 0.1   | 1.1   | 0.4   | 0.0   | 2.7   |  |
